# Supplementary material for: Hotspots of human impact on threatened terrestrial vertebrates
Source: PLoS Biol. 2019 Mar 12;17(3):e3000158. doi: 10.1371/journal.pbio.3000158 (PMC6413901; doi:10.1371/journal.pbio.3000158)
Supplement: S1 Data — (XLSX) [file pbio.3000158.s013.xlsx]

## Sheet: Processed Data for Fig. 2.
id_no	binomial	status	taxa	range size	area of range impacted by one threat (km2)	proportion of range impacted by one threat (%)	area of range impacted by multiple threats (km2)	proportion of range impacted by multiple threats (%)
1933	Aproteles bulmerae	CR	Mammal	50	50	100	0	0
3127	Bubalus mindorensis	CR	Mammal	66	66	100	63	95.4545
3329	Bunomys coelestis	CR	Mammal	135	135	100	30	22.2222
3553	Callicebus oenanthe	CR	Mammal	9169	9169	100	3179	34.6712
4216	Cercopithecus dryas	CR	Mammal	1377	1377	100	167	12.1278
6435	Dendrolagus scottae	CR	Mammal	1255	1255	100	205	16.3347
6553	Dicerorhinus sumatrensis	CR	Mammal	6934	6934	100	1294	18.6617
6773	Dobsonia chapmani	CR	Mammal	28	28	100	26	92.8571
6794	Dorcopsis atrata	CR	Mammal	85	85	100	19	22.3529
8202	Eulemur mongoz	CR	Mammal	6530	6530	100	5370	82.2358
11343	Lasiorhinus krefftii	CR	Mammal	90	90	100	65	72.2222
11503	Leontopithecus caissara	CR	Mammal	308	308	100	157	50.974
14254	Mysateles garridoi	CR	Mammal	21	21	100	21	100
15090	Octodon pacificus	CR	Mammal	50	50	100	45	90
16726	Petaurus abidi	CR	Mammal	96	96	100	19	19.7917
16851	Phalanger matanim	CR	Mammal	153	153	100	29	18.9542
18352	Propithecus tattersalli	CR	Mammal	1729	1729	100	1333	77.0966
18360	Propithecus candidus	CR	Mammal	1700	1700	100	220	12.9412
18361	Propithecus perrieri	CR	Mammal	60	60	100	60	100
18597	Pseudoryx nghetinhensis	CR	Mammal	14052	14052	100	3452	24.5659
19495	Rhinoceros sondaicus	CR	Mammal	182	182	100	25	13.7363
20229	Simias concolor	CR	Mammal	5525	5525	100	3475	62.8959
21172	Porcula salvania	CR	Mammal	887	887	100	721	81.2852
21175	Sus cebifrons	CR	Mammal	2384	2384	100	1545	64.807
21210	Sylvilagus mansuetus	CR	Mammal	16	16	100	0	0
22920	Varecia rubra	CR	Mammal	5293	5293	100	393	7.4249
23327	Zyzomys palatalis	CR	Mammal	562	562	100	0	0
39794	Macaca pagensis	CR	Mammal	1980	1980	100	1467	74.0909
39924	Oreonax flavicauda	CR	Mammal	26913	26913	100	4558	16.9361
39926	Lagothrix lugens	CR	Mammal	168758	168758	100	143958	85.3044
39961	Ateles hybridus	CR	Mammal	166818	166818	100	156518	93.8256
39994	Gorilla beringei	CR	Mammal	49298	49298	100	15898	32.2488
41026	Piliocolobus preussi	CR	Mammal	3828	3828	100	1028	26.8548
41642	Nomascus nasutus	CR	Mammal	8365	8365	100	6025	72.0263
44781	Rhinolophus hilli	CR	Mammal	123	123	100	60	48.7805
136218	Ailurops melanotis	CR	Mammal	240	240	100	218	90.8333
136322	Zaglossus attenboroughi	CR	Mammal	16	16	100	1	6.25
136491	Lepilemur jamesorum	CR	Mammal	64	64	100	47	73.4375
136645	Lepilemur sahamalazensis	CR	Mammal	1114	1114	100	766	68.7612
136696	Dendrolagus pulcherrimus	CR	Mammal	146	146	100	3	2.05479
136709	Lepilemur tymerlachsoni	CR	Mammal	52	52	100	39	75
13508501	Rhinopithecus strykeri	CR	Mammal	208	208	100	8	3.84615
14699281	Callicebus caquetensis	CR	Mammal	1367	1367	100	868	63.4967
22692857	Pareudiastes silvestris	CR	Bird	1	1	100	0	0
22680344	Rhodonessa caryophyllacea	CR	Bird	2	2	100	2	100
22685527	Anodorhynchus glaucus	CR	Bird	2	2	100	1	50
22734628	Liocichla bugunorum	CR	Bird	2	2	100	0	0
22720832	Loxops caeruleirostris	CR	Bird	7	7	100	0	0
22728605	Zosterops nehrkorni	CR	Bird	16	16	100	16	100
22724585	Otus moheliensis	CR	Bird	20	20	100	8	40
22710912	Leucopsar rothschildi	CR	Bird	34	34	100	22	64.7059
22720753	Pseudonestor xanthophrys	CR	Bird	49	49	100	10	20.4082
22710490	Aplonis pelzelni	CR	Bird	59	59	100	2	3.38983
22736345	Grallaria fenwickorum	CR	Bird	84	84	100	18	21.4286
22720742	Loxioides bailleui	CR	Bird	137	137	100	38	27.7372
22688694	Otus pauliani	CR	Bird	173	173	100	34	19.6532
22705959	Corvus kubaryi	CR	Bird	182	182	100	177	97.2527
22708583	Myadestes palmeri	CR	Bird	182	182	100	4	2.1978
22705080	Lanius newtoni	CR	Bird	260	260	100	65	25
22688686	Otus capnodes	CR	Bird	273	273	100	200	73.2601
22683487	Todiramphus godeffroyi	CR	Bird	377	377	100	0	0
22705953	Corvus unicolor	CR	Bird	389	389	100	336	86.3753
45090459	Pauxi koepckeae	CR	Bird	416	416	100	0	0
22707085	Eutrichomyias rowleyi	CR	Bird	486	486	100	439	90.3292
22697478	Bostrychia bocagei	CR	Bird	586	586	100	281	47.9522
22678869	Pternistis ochropectus	CR	Bird	617	617	100	461	74.7164
22689335	Heteroglaux blewitti	CR	Bird	657	657	100	653	99.3912
22691005	Gallicolumba menagei	CR	Bird	738	738	100	545	73.8482
22684986	Prioniturus verticalis	CR	Bird	764	764	100	570	74.6073
22682447	Anthracoceros montani	CR	Bird	1563	1563	100	1360	87.0122
54563	Atelopus zeteki	CR	Amphibian	1592	1592	100	1492	93.7186
56498	Craugastor catalinae	CR	Amphibian	1286	1286	100	958	74.4946
56976	Craugastor stadelmani	CR	Amphibian	802	802	100	26	3.2419
55617	Hyloscirtus ptychodactylus	CR	Amphibian	482	482	100	295	61.2033
56582	Craugastor epochthidius	CR	Amphibian	454	454	100	14	3.0837
55878	Plectrohyla ixil	CR	Amphibian	415	415	100	144	34.6988
54499	Atelopus chocoensis	CR	Amphibian	345	345	100	78	22.6087
55673	Plectrohyla thorectes	CR	Amphibian	340	340	100	83	24.4118
55311	Duellmanohyla salvavida	CR	Amphibian	330	330	100	34	10.303
54635	Incilius fastidiosus	CR	Amphibian	323	323	100	26	8.04954
55072	Prostherapis dunni	CR	Amphibian	311	311	100	233	74.9196
56872	Craugastor polymniae	CR	Amphibian	303	303	100	21	6.93069
20372	Pleurodema somuncurensis	CR	Amphibian	240	240	100	0	0
54907	Centrolene ballux	CR	Amphibian	240	240	100	158	65.8333
55190	Oophaga lehmanni	CR	Amphibian	240	240	100	137	57.0833
55447	Plectrohyla chryses	CR	Amphibian	228	228	100	109	47.807
57125	Leptodactylus fallax	CR	Amphibian	211	211	100	177	83.8863
55438	Plectrohyla celata	CR	Amphibian	205	205	100	107	52.1951
55040	Aromobates nocturnus	CR	Amphibian	188	188	100	188	100
55071	Hyloxalus delatorreae	CR	Amphibian	184	184	100	143	77.7174
57366	Telmatobius vellardi	CR	Amphibian	172	172	100	168	97.6744
54495	Atelopus carbonerensis	CR	Amphibian	148	148	100	148	100
56598	Craugastor fecundus	CR	Amphibian	144	144	100	9	6.25
54530	Atelopus muisca	CR	Amphibian	136	136	100	136	100
55874	Plectrohyla exquisita	CR	Amphibian	136	136	100	30	22.0588
21533	Taudactylus pleione	CR	Amphibian	128	128	100	56	43.75
59058	Ambystoma granulosum	CR	Amphibian	125	125	100	125	100
16997	Philoria frosti	CR	Amphibian	105	105	100	43	40.9524
1095	Ambystoma mexicanum	CR	Amphibian	102	102	100	86	84.3137
56413	Craugastor anciano	CR	Amphibian	93	93	100	80	86.0215
136089	Rana holtzi	CR	Amphibian	87	87	100	16	18.3908
55241	Mannophryne caquetio	CR	Amphibian	84	84	100	31	36.9048
55456	Plectrohyla crassa	CR	Amphibian	79	79	100	46	58.2278
59421	Thorius narisovalis	CR	Amphibian	79	79	100	5	6.32911
55681	Charadrahyla trux	CR	Amphibian	77	77	100	6	7.79221
56810	Craugastor omoaensis	CR	Amphibian	74	74	100	66	89.1892
54516	Atelopus guitarraensis	CR	Amphibian	66	66	100	66	100
54546	Atelopus reticulatus	CR	Amphibian	66	66	100	2	3.0303
55459	Plectrohyla cyanomma	CR	Amphibian	63	63	100	44	69.8413
55431	Plectrohyla calvicollina	CR	Amphibian	55	55	100	10	18.1818
57013	Craugastor trachydermus	CR	Amphibian	52	52	100	2	3.84615
55245	Mannophryne lamarcai	CR	Amphibian	51	51	100	51	100
57448	Mantella milotympanum	CR	Amphibian	51	51	100	33	64.7059
59447	Echinotriton chinhaiensis	CR	Amphibian	50	50	100	49	98
54542	Atelopus pinangoi	CR	Amphibian	48	48	100	48	100
56629	Eleutherodactylus grandis	CR	Amphibian	48	48	100	48	100
61835	Telmatobius timens	CR	Amphibian	48	48	100	44	91.6667
54524	Atelopus lynchi	CR	Amphibian	42	42	100	18	42.8571
175544	Xenopus itombwensis	CR	Amphibian	41	41	100	21	51.2195
54912	Centrolene gemmatum	CR	Amphibian	37	37	100	0	0
59061	Ambystoma leorae	CR	Amphibian	37	37	100	15	40.5405
19182	Lithobates tlaloci	CR	Amphibian	34	34	100	34	100
54432	Leptodactylodon erythrogaster	CR	Amphibian	33	33	100	32	96.9697
55471	Ecnomiohyla echinata	CR	Amphibian	33	33	100	0	0
55883	Plectrohyla pycnochila	CR	Amphibian	29	29	100	29	100
55639	Plectrohyla sabrina	CR	Amphibian	25	25	100	0	0
59368	Pseudoeurycea anitae	CR	Amphibian	24	24	100	0	0
175371	Phrynobatrachus intermedius	CR	Amphibian	23	23	100	14	60.8696
54517	Atelopus halihelos	CR	Amphibian	21	21	100	19	90.4762
55886	Plectrohyla tecunumani	CR	Amphibian	21	21	100	19	90.4762
56874	Eleutherodactylus poolei	CR	Amphibian	20	20	100	5	25
54515	Atelopus guanujo	CR	Amphibian	18	18	100	18	100
59051	Ambystoma andersoni	CR	Amphibian	18	18	100	18	100
55430	Plectrohyla calthula	CR	Amphibian	17	17	100	0	0
55658	Plectrohyla siopela	CR	Amphibian	16	16	100	0	0
59408	Thorius aureus	CR	Amphibian	16	16	100	0	0
41118	Cophixalus concinnus	CR	Amphibian	15	15	100	0	0
54410	Cardioglossa trifasciata	CR	Amphibian	14	14	100	1	7.14286
55583	Plectrohyla pachyderma	CR	Amphibian	14	14	100	5	35.7143
55384	Charadrahyla altipotens	CR	Amphibian	13	13	100	10	76.9231
16854228	Cardioglossa manengouba	CR	Amphibian	12	12	100	3	25
56753	Craugastor megalotympanum	CR	Amphibian	12	12	100	0	0
59143	Bolitoglossa carri	CR	Amphibian	10	10	100	0	0
48086163	Scinax muriciensis	CR	Amphibian	9	9	100	9	100
56319	Alsodes pehuenche	CR	Amphibian	9	9	100	9	100
57224	Phrynopus peruanus	CR	Amphibian	9	9	100	9	100
57331	Telmatobius cirrhacelis	CR	Amphibian	9	9	100	9	100
54532	Atelopus nanay	CR	Amphibian	8	8	100	8	100
59393	Pseudoeurycea robertsi	CR	Amphibian	8	8	100	0	0
54568	Rhinella amabilis	CR	Amphibian	7	7	100	7	100
56639	Craugastor guerreroensis	CR	Amphibian	7	7	100	7	100
18435526	Atelopus gigas	CR	Amphibian	6	6	100	6	100
57703	Balebreviceps hillmani	CR	Amphibian	5	5	100	4	80
158613	Ecnomiohyla rabborum	CR	Amphibian	4	4	100	4	100
18435530	Atelopus orcesi	CR	Amphibian	4	4	100	2	50
186064	Atelopus chirripoensis	CR	Amphibian	4	4	100	0	0
55675	Isthmohyla tica	CR	Amphibian	4	4	100	0	0
58947	Taruga fastigo	CR	Amphibian	4	4	100	4	100
136003	Litoria myola	CR	Amphibian	3	3	100	3	100
56402	Pristimantis albericoi	CR	Amphibian	3	3	100	0	0
58176	Xenopus longipes	CR	Amphibian	3	3	100	0	0
61791	Plectrohyla ephemera	CR	Amphibian	3	3	100	0	0
54458	Adenomus kandianus	CR	Amphibian	1	1	100	1	100
22734789	Turnix novaecaledoniae	CR (PE)	Bird	16288	16288	100	9718	59.6636
22698097	Pterodroma caribbaea	CR (PE)	Bird	1	1	100	0	0
22720863	Melamprosops phaeosoma	CR (PE)	Bird	12	12	100	0	0
22732931	Pomarea mira	CR (PE)	Bird	105	105	100	0	0
1894	Apodemus gurkha	EN	Mammal	1633	1633	100	765	46.8463
2282	Ateles marginatus	EN	Mammal	273859	273859	100	48627	17.7562
2435	Avahi occidentalis	EN	Mammal	3072	3072	100	2461	80.1107
2446	Axis calamianensis	EN	Mammal	1299	1299	100	1150	88.5296
3126	Bubalus depressicornis	EN	Mammal	102886	102886	100	52570	51.0954
3554	Callicebus olallae	EN	Mammal	679	679	100	679	100
3748	Canis simensis	EN	Mammal	6184	6184	100	2744	44.3726
4037	Catopuma badia	EN	Mammal	196289	196289	100	35999	18.3398
4200	Cercocebus galeritus	EN	Mammal	200	200	100	109	54.5
4685	Chiropotes albinasus	EN	Mammal	530200	530200	100	104624	19.7329
5502	Crateromys heaneyi	EN	Mammal	3974	3974	100	2874	72.3201
6433	Dendrolagus matschiei	EN	Mammal	12801	12801	100	4381	34.2239
7014	Echiothrix leucura	EN	Mammal	15247	15247	100	12307	80.7175
8834	Galidictis grandidieri	EN	Mammal	995	995	100	994	99.8995
10054	Hippocamelus bisulcus	EN	Mammal	74432	74432	100	17723	23.811
10547	Hylobates klossii	EN	Mammal	5574	5574	100	3514	63.0427
10714	Hypogeomys antimena	EN	Mammal	326	326	100	214	65.6442
12553	Macaca maura	EN	Mammal	4826	4826	100	3806	78.8645
13216	Mesocapromys auritus	EN	Mammal	55	55	100	55	100
13961	Mus fernandoni	EN	Mammal	102	102	100	101	99.0196
15932	Pan paniscus	EN	Mammal	417828	417828	100	127828	30.5934
16858	Phalanger alexandrae	EN	Mammal	129	129	100	115	89.1473
18130	Presbytis potenziani	EN	Mammal	5525	5525	100	3475	62.8959
18356	Propithecus coronatus	EN	Mammal	45560	45560	100	40110	88.0378
18656	Pteralopex anceps	EN	Mammal	8689	8689	100	5939	68.3508
18744	Pteropus nitendiensis	EN	Mammal	216	216	100	97	44.9074
19342	Rattus lugens	EN	Mammal	5525	5525	100	3475	62.8959
19742	Romerolagus diazi	EN	Mammal	459	459	100	181	39.4336
20336	Solomys sapientis	EN	Mammal	3774	3774	100	2264	59.9894
22065	Tragulus nigricans	EN	Mammal	455	455	100	294	64.6154
29473	Pteralopex taki	EN	Mammal	2575	2575	100	985	38.2524
39869	Trachypithecus shortridgei	EN	Mammal	10432	10432	100	2612	25.0383
39992	Piliocolobus kirkii	EN	Mammal	739	739	100	556	75.2368
44786	Rhinolophus ziama	EN	Mammal	2495	2495	100	505	20.2405
136397	Pteropus cognatus	EN	Mammal	2631	2631	100	1944	73.8883
136458	Microcebus jollyae	EN	Mammal	160	160	100	133	83.125
136472	Babyrousa togeanensis	EN	Mammal	443	443	100	379	85.553
136622	Lepilemur mittermeieri	EN	Mammal	1083	1083	100	456	42.1053
136643	Moschus anhuiensis	EN	Mammal	13046	13046	100	5746	44.0442
136662	Lepilemur betsileo	EN	Mammal	2201	2201	100	361	16.4016
136771	Lepilemur grewcockorum	EN	Mammal	1882	1882	100	1583	84.1126
16971390	Microcebus arnholdi	EN	Mammal	150	150	100	8	5.33333
16971489	Lepilemur hollandorum	EN	Mammal	282	282	100	76	26.9504
16971518	Lepilemur scottorum	EN	Mammal	2000	2000	100	100	5
16971566	Avahi mooreorum	EN	Mammal	2000	2000	100	100	5
22711366	Cistothorus apolinari	EN	Bird	24425	24425	100	23497	96.2006
22691186	Treron psittaceus	EN	Bird	20733	20733	100	20200	97.4292
22679678	Odontophorus strophium	EN	Bird	3843	3843	100	3596	93.5727
22724010	Psarocolius cassini	EN	Bird	8394	8394	100	2154	25.6612
22692482	Rallus semiplumbeus	EN	Bird	11862	11862	100	11809	99.5532
22691622	Ducula mindorensis	EN	Bird	2495	2495	100	1365	54.7094
22682531	Rhyticeros narcondami	EN	Bird	5	5	100	0	0
22692395	Hypotaenidia sylvestris	EN	Bird	9	9	100	0	0
22691674	Ducula galeata	EN	Bird	31	31	100	0	0
22728176	Treron griveaudi	EN	Bird	62	62	100	42	67.7419
22728354	Eunymphicus uvaeensis	EN	Bird	135	135	100	135	100
22692476	Rallus wetmorei	EN	Bird	139	139	100	130	93.5252
22709303	Humblotia flavirostris	EN	Bird	196	196	100	36	18.3673
22721919	Myioborus pariae	EN	Bird	276	276	100	30	10.8696
22690138	Columba thomensis	EN	Bird	352	352	100	104	29.5455
22729557	Poecilotriccus luluae	EN	Bird	368	368	100	1	0.271739
22734762	Clytorhynchus sanctaecrucis	EN	Bird	477	477	100	273	57.2327
22685836	Pyrrhura viridicata	EN	Bird	581	581	100	354	60.9294
22714806	Acrocephalus caffer	EN	Bird	618	618	100	334	54.0453
22691121	Phapitreron cinereiceps	EN	Bird	638	638	100	453	71.0031
22693068	Scolopax rochussenii	EN	Bird	675	675	100	245	36.2963
22720814	Oreomystis mana	EN	Bird	750	750	100	122	16.2667
22728616	Gymnocrex talaudensis	EN	Bird	751	751	100	522	69.5073
22735416	Myiomela major	EN	Bird	1170	1170	100	466	39.8291
22735423	Myiomela albiventris	EN	Bird	1354	1354	100	376	27.7696
45422623	Pyrrhura eisenmanni	EN	Bird	1539	1539	100	816	53.0214
22691047	Alopecoenas sanctaecrucis	EN	Bird	2264	2264	100	1498	66.1661
57330	Telmatobius ceiorum	EN	Amphibian	1767	1767	100	167	9.45105
19304	Ranodon sibiricus	EN	Amphibian	16151	16151	100	15101	93.4989
57867	Madecassophryne truebae	EN	Amphibian	1456	1456	100	376	25.8242
56838	Craugastor pechorum	EN	Amphibian	1752	1752	100	62	3.53881
57492	Gephyromantis klemmeri	EN	Amphibian	1344	1344	100	104	7.7381
57504	Spinomantis microtis	EN	Amphibian	1458	1458	100	368	25.2401
57962	Platypelis tetra	EN	Amphibian	6354	6354	100	1644	25.8735
55916	Ptychohyla salvadorensis	EN	Amphibian	3692	3692	100	3043	82.4215
54408	Cardioglossa pulchra	EN	Amphibian	4690	4690	100	2790	59.4883
54353	Philoria kundagungan	EN	Amphibian	1609	1609	100	1062	66.0037
56913	Craugastor rhyacobatrachus	EN	Amphibian	1415	1415	100	918	64.8763
57470	Spinomantis brunae	EN	Amphibian	1345	1345	100	651	48.4015
57443	Mantella expectata	EN	Amphibian	1104	1104	100	1104	100
57971	Rhombophryne guentherpetersi	EN	Amphibian	1030	1030	100	79	7.6699
54521	Atelopus longibrachius	EN	Amphibian	1023	1023	100	373	36.4614
57954	Platypelis alticola	EN	Amphibian	982	982	100	143	14.5621
57382	Philoria richmondensis	EN	Amphibian	973	973	100	530	54.4707
55016	Hyalinobatrachium guairarepanense	EN	Amphibian	867	867	100	683	78.7774
57451	Mantella viridis	EN	Amphibian	784	784	100	595	75.8929
57068	Pristimantis zophus	EN	Amphibian	645	645	100	472	73.1783
20459	Speleomantes supramontis	EN	Amphibian	619	619	100	458	73.9903
57998	Scaphiophryne gottlebei	EN	Amphibian	617	617	100	617	100
55587	Hyloscirtus pantostictus	EN	Amphibian	494	494	100	44	8.90688
55264	Phyllobates terribilis	EN	Amphibian	426	426	100	75	17.6056
57360	Telmatobius scrocchii	EN	Amphibian	391	391	100	65	16.624
57347	Telmatobius laticeps	EN	Amphibian	371	371	100	256	69.0027
57407	Boophis jaegeri	EN	Amphibian	350	350	100	212	60.5714
59149	Bolitoglossa conanti	EN	Amphibian	341	341	100	198	58.0645
55879	Plectrohyla lacertosa	EN	Amphibian	302	302	100	52	17.2185
55546	Hyloscirtus lynchi	EN	Amphibian	293	293	100	269	91.8089
57206	Bryophryne cophites	EN	Amphibian	271	271	100	8	2.95203
57441	Mantella cowanii	EN	Amphibian	250	250	100	224	89.6
193430	Ranitomeya summersi	EN	Amphibian	243	243	100	97	39.9177
57356	Telmatobius pisanoi	EN	Amphibian	239	239	100	128	53.5565
57357	Telmatobius platycephalus	EN	Amphibian	236	236	100	49	20.7627
57343	Telmatobius hypselocephalus	EN	Amphibian	187	187	100	47	25.1337
55308	Duellmanohyla ignicolor	EN	Amphibian	183	183	100	45	24.5902
56797	Eleutherodactylus nubicola	EN	Amphibian	179	179	100	98	54.7486
57056	Eleutherodactylus wightmanae	EN	Amphibian	174	174	100	174	100
54519	Atelopus laetissimus	EN	Amphibian	168	168	100	34	20.2381
57332	Telmatobius colanensis	EN	Amphibian	152	152	100	0	0
16575406	Arthroleptis bioko	EN	Amphibian	126	126	100	120	95.2381
57677	Anodonthyla rouxae	EN	Amphibian	100	100	100	0	0
3181	Anaxyrus nelsoni	EN	Amphibian	73	73	100	57	78.0822
29426	Nototriton brodiei	EN	Amphibian	65	65	100	0	0
55663	Hyloscirtus staufferorum	EN	Amphibian	43	43	100	43	100
57348	Telmatobius latirostris	EN	Amphibian	41	41	100	23	56.0976
136047	Oreobates ayacucho	EN	Amphibian	39	39	100	29	74.359
55359	Gastrotheca splendens	EN	Amphibian	38	38	100	10	26.3158
54471	Ansonia latidisca	EN	Amphibian	18	18	100	17	94.4444
56450	Pristimantis balionotus	EN	Amphibian	10	10	100	10	100
9919	Hemitragus jemlahicus	NT	Mammal	120260	120260	100	61485	51.1267
13931	Murexia rothschildi	NT	Mammal	14898	14898	100	2098	14.0824
136387	Pteropus pelewensis	NT	Mammal	413	413	100	302	73.1235
22691991	Heterotetrax humilis	NT	Bird	477374	477374	100	322319	67.5192
22687957	Haplophaedia lugens	NT	Bird	4952	4952	100	3082	62.2375
22724980	Mentocrex beankaensis	NT	Bird	3767	3767	100	1967	52.2166
22686125	Pyrilia pyrilia	NT	Bird	203161	203161	100	175061	86.1686
22714821	Acrocephalus kerearako	NT	Bird	56	56	100	47	83.9286
22709376	Ficedula henrici	NT	Bird	185	185	100	141	76.2162
22691581	Chrysoena viridis	NT	Bird	396	396	100	267	67.4242
22713250	Hypsipetes nicobariensis	NT	Bird	415	415	100	215	51.8072
22734397	Cettia haddeni	NT	Bird	552	552	100	189	34.2391
22703671	Sericulus bakeri	NT	Bird	560	560	100	146	26.0714
22736406	Turdus olivaceofuscus	NT	Bird	844	844	100	521	61.7299
22690549	Macropygia rufipennis	NT	Bird	7165	7165	100	3495	48.7788
56344	Crossodactylodes bokermanni	NT	Amphibian	1614	1614	100	1025	63.5068
512	Addax nasomaculatus	CR	Mammal	7209	7209	100	383	5.3128
6232	Dama mesopotamica	EN	Mammal	523	523	100	228	43.5946
140	Acerodon leucotis	VU	Mammal	12589	12589	100	7859	62.4275
3330	Bunomys fratrorum	VU	Mammal	15754	15754	100	12804	81.2746
6434	Dendrolagus ursinus	VU	Mammal	20859	20859	100	6091	29.2008
8209	Eulemur rufus	VU	Mammal	37881	37881	100	31791	83.9233
11621	Lepilemur ruficaudatus	VU	Mammal	15955	15955	100	13375	83.8295
12914	Mazama rufina	VU	Mammal	50703	50703	100	26255	51.7819
19496	Rhinoceros unicornis	VU	Mammal	3293	3293	100	2622	79.6234
21177	Sus ahoenobarbus	VU	Mammal	10377	10377	100	6087	58.6586
39795	Macaca siberu	VU	Mammal	3637	3637	100	2077	57.1075
39915	Aotus brumbacki	VU	Mammal	118685	118685	100	104680	88.1999
40582	Pseudochirops coronatus	VU	Mammal	5864	5864	100	747	12.7387
40641	Pseudochirulus schlegeli	VU	Mammal	7711	7711	100	1025	13.2927
43912	Alouatta discolor	VU	Mammal	217127	217127	100	28518	13.1342
136301	Mazama bricenii	VU	Mammal	31878	31878	100	28648	89.8676
136340	Sus oliveri	VU	Mammal	2469	2469	100	1543	62.4949
136500	Presbytis natunae	VU	Mammal	1612	1612	100	502	31.1414
136531	Pteropus ualanus	VU	Mammal	99	99	100	53	53.5354
136685	Pteropus rennelli	VU	Mammal	530	530	100	234	44.1509
22685919	Bolborhynchus ferrugineifrons	VU	Bird	3511	3511	100	3098	88.237
22690302	Patagioenas oenops	VU	Bird	14359	14359	100	9549	66.5018
22685867	Pyrrhura calliptera	VU	Bird	34302	34302	100	31332	91.3416
22688359	Tauraco ruspolii	VU	Bird	12000	12000	100	5270	43.9167
22727878	Prioniturus mindorensis	VU	Bird	9835	9835	100	8025	81.5963
22714826	Acrocephalus rimatarae	VU	Bird	5	5	100	0	0
22686581	Aerodramus sawtelli	VU	Bird	25	25	100	25	100
22714839	Acrocephalus taiti	VU	Bird	39	39	100	0	0
22684636	Vini stepheni	VU	Bird	41	41	100	0	0
22691490	Ptilinopus insularis	VU	Bird	42	42	100	0	0
22692711	Zapornia atra	VU	Bird	42	42	100	0	0
22683465	Todiramphus ruficollaris	VU	Bird	49	49	100	47	95.9184
22710485	Aplonis santovestris	VU	Bird	59	59	100	33	55.9322
22713976	Zosterops mouroniensis	VU	Bird	70	70	100	0	0
22679673	Odontophorus dialeucos	VU	Bird	238	238	100	47	19.7479
22715170	Amaurocichla bocagei	VU	Bird	345	345	100	101	29.2754
22690868	Leptotila battyi	VU	Bird	1780	1780	100	893	50.1685
22678583	Megapodius nicobariensis	VU	Bird	2153	2153	100	853	39.6191
57392	Boophis blommersae	VU	Amphibian	2405	2405	100	955	39.7089
55210	Andinobates viridis	VU	Amphibian	4977	4977	100	1537	30.8821
57525	Gephyromantis tandroka	VU	Amphibian	4456	4456	100	406	9.11131
57520	Gephyromantis schilfi	VU	Amphibian	3662	3662	100	342	9.33916
57523	Gephyromantis spiniferus	VU	Amphibian	7529	7529	100	2139	28.4101
58326	Limnonectes acanthi	VU	Amphibian	4393	4393	100	2473	56.2941
57505	Boehmantis microtympanum	VU	Amphibian	4762	4762	100	2182	45.8211
55607	Hyloscirtus platydactylus	VU	Amphibian	5100	5100	100	4843	94.9608
17528	Platymantis cornutus	VU	Amphibian	9023	9023	100	5263	58.3287
57444	Mantella haraldmeieri	VU	Amphibian	1988	1988	100	718	36.1167
55606	Exerodonta pinorum	VU	Amphibian	1089	1089	100	343	31.4968
57489	Gephyromantis horridus	VU	Amphibian	984	984	100	287	29.1667
47144426	Tylototriton notialis	VU	Amphibian	651	651	100	266	40.8602
54511	Atelopus flavescens	VU	Amphibian	483	483	100	78	16.1491
17524	Platymantis banahao	VU	Amphibian	120	120	100	23	19.1667
57340	Telmatobius hauthali	VU	Amphibian	120	120	100	11	9.16667
55171	Andinobates altobueyensis	VU	Amphibian	92	92	100	0	0
56962	Pristimantis signifer	VU	Amphibian	86	86	100	23	26.7442
57341	Telmatobius hockingi	VU	Amphibian	84	84	100	80	95.2381
40785	Alsodes tumultuosus	VU	Amphibian	52	52	100	0	0
17632	Plethodon hubrichti	VU	Amphibian	51	51	100	39	76.4706
57447	Mantella manery	VU	Amphibian	35	35	100	0	0
135747	Andinobates dorisswansonae	VU	Amphibian	32	32	100	32	100
9032	Geocrinia vitellina	VU	Amphibian	14	14	100	7	50
186065	Diasporus ventrimaculatus	VU	Amphibian	4	4	100	0	0
135985	Rhinella yanachaga	VU	Amphibian	1	1	100	0	0
2888	Bos javanicus	EN	Mammal	174946	174945	99.9994	73007	41.7314
8968	Nanger dama	CR	Mammal	109573	109572	99.9991	49222	44.9221
11175	Lagothrix lagotricha	VU	Mammal	246103	246098	99.998	49228	20.0034
39927	Lagothrix poeppigii	VU	Mammal	336305	336296	99.9973	42706	12.6989
39925	Lagothrix cana	EN	Mammal	748079	748058	99.9972	156202	20.881
2276	Ateles belzebuth	EN	Mammal	459817	459803	99.997	125043	27.1949
9678	Hapalemur occidentalis	VU	Mammal	39876	39874	99.995	12174	30.5312
22732	Panthera uncia	EN	Mammal	2308145	2308019	99.9945	1469963	63.6894
41547	Ateles chamek	EN	Mammal	1484716	1484614	99.9931	397156	26.7515
714	Ailurus fulgens	EN	Mammal	334031	334007	99.9928	172719	51.7112
18127	Presbytis frontata	VU	Mammal	251320	251301	99.9924	89448	35.594
3160	Budorcas taxicolor	VU	Mammal	429445	429410	99.9918	245925	57.2704
40019	Cebus kaapori	CR	Mammal	191284	191258	99.9864	74253	38.8235
22687614	Amazilia castaneiventris	EN	Bird	14677	14675	99.9864	14573	99.2914
13901	Moschus leucogaster	EN	Mammal	220073	220041	99.9855	110810	50.3588
3129	Bubalus arnee	EN	Mammal	13004	13002	99.9846	6952	53.4687
39957	Alouatta belzebul	VU	Mammal	680250	680132	99.9827	343544	50.5114
12392	Loxodonta africana	VU	Mammal	3236098	3235232	99.9732	1891353	58.4611
55075	Hyloxalus elachyhistus	EN	Amphibian	14863	14859	99.9731	8369	56.3076
22690201	Columba palumboides	NT	Bird	7177	7175	99.9721	3495	48.6972
17975	Pongo pygmaeus	CR	Mammal	214772	214708	99.9702	74991	34.927
7951	Equus hemionus	EN	Mammal	211183	211120	99.9702	79070	37.4526
57959	Platypelis milloti	EN	Amphibian	3348	3347	99.9701	987	29.4803
4220	Allochrocebus lhoesti	VU	Mammal	217422	217357	99.9701	62357	28.6887
21176	Sus philippensis	VU	Mammal	63116	63096	99.9683	38378	60.8248
63543	Camelus ferus	CR	Mammal	84792	84764	99.967	2606	3.07442
22689670	Eurostopodus diabolicus	VU	Bird	49110	49093	99.9654	30788	62.6919
12436	Lycaon pictus	EN	Mammal	1063425	1063037	99.9635	594340	55.9096
22679576	Dendrortyx barbatus	VU	Bird	8208	8205	99.9635	6055	73.7695
22686288	Amazona rhodocorytha	EN	Bird	27031	27021	99.963	21741	80.4299
41772	Sus barbatus	VU	Mammal	508583	508380	99.9601	223147	43.8937
22039	Trachypithecus obscurus	NT	Mammal	252705	252604	99.96	155482	61.5517
6678	Dipodomys ingens	EN	Mammal	6802	6799	99.9559	6076	89.3661
22694980	Henicopernis infuscatus	VU	Bird	19658	19649	99.9542	10979	55.85
136603	Neofelis diardi	VU	Mammal	429221	429024	99.9541	125631	29.283
22692311	Rallina canningi	NT	Bird	4355	4353	99.9541	2063	47.3708
55262	Phyllobates bicolor	NT	Amphibian	6460	6457	99.9536	1717	26.5789
18354	Propithecus verreauxi	EN	Mammal	68142	68109	99.9516	58839	86.3895
22726279	Treron chloropterus	NT	Bird	5950	5947	99.9496	2567	43.1429
22037	Trachypithecus geei	EN	Mammal	5713	5710	99.9475	3730	65.324
42697	Cebus robustus	EN	Mammal	120544	120479	99.9461	100579	83.4826
2891	Bos gaurus	VU	Mammal	1352299	1351560	99.9454	754113	55.7957
8205	Eulemur cinereiceps	CR	Mammal	1828	1827	99.9453	397	21.7296
22692604	Gymnocrex rosenbergii	VU	Bird	48057	48030	99.9438	31725	66.0154
54924	Centrolene lynchi	EN	Amphibian	3408	3406	99.9413	1366	40.0822
12913	Mazama chunyi	VU	Mammal	134060	133979	99.9396	60189	44.9242
18753	Pteropus pumilus	NT	Mammal	57358	57323	99.939	49212	85.8504
15953	Panthera onca	NT	Mammal	6290191	6286271	99.9377	2926309	46.5508
11496	Lemur catta	EN	Mammal	100448	100385	99.9373	89585	89.2414
18711	Pteronura brasiliensis	EN	Mammal	3659458	3657118	99.9361	1162645	31.7913
11511	Leopardus wiedii	NT	Mammal	9060042	9054050	99.9339	5064335	55.9345
11037	Kobus vardonii	NT	Mammal	352773	352524	99.9294	200717	56.9371
58436	Quasipaa robertingeri	EN	Amphibian	1340	1339	99.9254	169	12.6119
21492	Tarsius syrichta	NT	Mammal	119786	119696	99.9249	87564	73.1553
22678525	Crax alberti	CR	Bird	57054	57010	99.9229	51770	90.7386
39827	Pygathrix cinerea	CR	Mammal	24864	24844	99.9196	12240	49.2674
5500	Crateromys schadenbergi	EN	Mammal	3712	3709	99.9192	2159	58.2098
57458	Gephyromantis ambohitra	VU	Amphibian	4631	4627	99.9136	1837	39.6675
2461	Babyrousa babyrussa	VU	Mammal	12574	12563	99.9125	8684	69.1236
15954	Panthera pardus	VU	Mammal	12387697	12376857	99.9125	7792511	62.9603
40799	Limnonectes diuatus	VU	Amphibian	4514	4510	99.9114	2160	47.8511
44703	Muntiacus vuquangensis	CR	Mammal	109235	109137	99.9103	38303	35.0963
136269	Eulemur rufifrons	NT	Mammal	32680	32650	99.9082	24440	74.8545
54560	Atelopus varius	CR	Amphibian	6124	6118	99.902	4968	81.1234
22688340	Tauraco bannermani	EN	Bird	2003	2001	99.9001	691	34.4983
40015	Piliocolobus gordonorum	EN	Mammal	5879	5873	99.8979	2713	46.1944
57502	Spinomantis massi	VU	Amphibian	7790	7782	99.8973	3432	44.0565
22705877	Zavattariornis stresemanni	EN	Bird	4636	4631	99.8921	4404	94.9957
14352	Nasalis larvatus	EN	Mammal	487182	486635	99.8877	225836	46.4077
22695105	Haliaeetus sanfordi	VU	Bird	35580	35540	99.8876	21340	59.9775
57487	Spinomantis guibei	VU	Amphibian	1765	1763	99.8867	663	37.5637
22726883	Actenoides excelsus	EN	Bird	1754	1752	99.886	977	55.7013
22728429	Cacatua ophthalmica	VU	Bird	34041	34002	99.8854	19902	58.4648
22695929	Buteo solitarius	NT	Bird	6943	6935	99.8848	3385	48.7541
4219	Cercopithecus hamlyni	VU	Mammal	240301	240016	99.8814	70016	29.1714
3416	Cacajao calvus	VU	Mammal	128985	128827	99.8775	10788	8.37402
6937	Dyscophus antongilii	NT	Amphibian	4845	4839	99.8762	1689	34.8607
22684954	Prioniturus montanus	NT	Bird	10462	10449	99.8757	3899	37.2682
54428	Leptodactylodon bicolor	VU	Amphibian	6340	6332	99.8738	3302	52.082
21491	Tarsius tarsier	VU	Mammal	137592	137411	99.8685	90665	65.9809
39828	Pygathrix nigripes	EN	Mammal	94488	94363	99.8677	43422	46.0159
22690226	Columba pallidiceps	VU	Bird	61651	61569	99.867	39869	64.6689
22692421	Hypotaenidia insignis	NT	Bird	34052	34006	99.8649	20006	58.7513
57450	Mantella pulchra	VU	Amphibian	16245	16222	99.8584	8122	49.9969
1087	Neamblysomus gunningi	EN	Mammal	9662	9648	99.8551	8823	91.449
136446	Babyrousa celebensis	VU	Mammal	131007	130812	99.8512	74203	56.7249
4038	Catopuma temminckii	NT	Mammal	325934	325443	99.8494	109898	33.7687
21471	Tapirus bairdii	EN	Mammal	603353	602435	99.8479	320108	53.1357
136717	Cebus nigritus	NT	Mammal	883158	881808	99.8471	761994	86.4127
59109	Pachyhynobius shangchengensis	VU	Amphibian	12879	12859	99.8447	7409	57.5278
18148	Prionailurus planiceps	EN	Mammal	135240	135026	99.8418	33163	24.5605
12557	Macaca ochreata	VU	Mammal	39492	39427	99.8354	24016	60.9126
19713	Rhynchomys soricoides	NT	Mammal	4244	4237	99.8351	2397	56.573
22698628	Pitta gurneyi	EN	Bird	2421	2417	99.8348	1047	43.2466
12563	Macaca tonkeana	VU	Mammal	79832	79698	99.8321	43168	54.1645
22804	Uromys neobritannicus	NT	Mammal	35263	35201	99.8242	20401	57.9557
13924	Muntiacus crinifrons	VU	Mammal	114298	114092	99.8198	63092	55.2992
12420	Hydrictis maculicollis	NT	Mammal	9654959	9637532	99.8195	5698079	59.1238
6299	Dasyurus albopunctatus	NT	Mammal	528654	527682	99.8161	170106	32.2365
18355	Propithecus coquereli	EN	Mammal	30887	30830	99.8155	25290	82.0305
22706261	Paradisaea guilielmi	NT	Bird	10800	10780	99.8148	5220	48.3333
15951	Panthera leo	VU	Mammal	3547547	3540960	99.8143	2293687	64.7759
41773	Sus celebensis	NT	Mammal	175366	175037	99.8124	112028	64.0025
4153	Cephalophus zebra	VU	Mammal	59404	59289	99.8064	9189	15.4987
4140	Cephalophus jentinki	EN	Mammal	60117	59999	99.8037	9299	15.4986
57446	Mantella madagascariensis	VU	Amphibian	12265	12240	99.7962	7650	62.3726
3787	Capra falconeri	NT	Mammal	24887	24836	99.7951	12536	50.4751
39896	Nomascus siki	EN	Mammal	26652	26596	99.7899	6473	24.3382
22710565	Aplonis brunneicapillus	EN	Bird	24687	24634	99.7853	15454	62.5997
187822	Gracixalus quyeti	EN	Amphibian	1386	1383	99.7835	223	16.0895
6635	Diplogale hosei	VU	Mammal	62948	62810	99.7808	12587	20.0398
12421	Lutra sumatrana	EN	Mammal	780315	778588	99.7787	404705	51.9794
4274	Rusa marianna	VU	Mammal	110923	110677	99.7782	68045	61.4807
57462	Spinomantis bertini	NT	Amphibian	8532	8513	99.7773	2243	26.2893
7950	Equus grevyi	EN	Mammal	66907	66757	99.7758	40765	61.0648
13143	Melursus ursinus	VU	Mammal	1509922	1506526	99.7751	1309298	86.9084
3797	Capra walie	EN	Mammal	850	848	99.7647	221	26.0613
20639	Spilocuscus rufoniger	CR	Mammal	162031	161637	99.7568	53182	32.9021
12520	Lynx pardinus	EN	Mammal	1187	1184	99.7473	550	46.4527
15309	Leopardus colocolo	NT	Mammal	4433380	4421946	99.7421	2772002	62.6874
135446	Ateles fusciceps	CR	Mammal	216448	215875	99.7353	132084	61.1854
15569	Oryx leucoryx	EN	Mammal	24020	23956	99.7336	4757	19.8572
22678194	Crypturellus kerriae	VU	Bird	18979	18928	99.7313	4628	24.3848
918	Alouatta ululata	EN	Mammal	100198	99921	99.7235	55721	55.7651
22690596	Reinwardtoena browni	NT	Bird	30408	30320	99.7106	17020	55.9721
6799	Dorcopsis luctuosa	VU	Mammal	145777	145355	99.7105	57823	39.7805
22682937	Geobiastes squamiger	VU	Bird	21288	21226	99.7088	5626	26.428
18745	Pteropus ocularis	VU	Mammal	25113	25039	99.7053	19758	78.9089
18128	Presbytis hosei	VU	Mammal	206062	205447	99.7015	85123	41.4331
6793	Dorcatragus megalotis	VU	Mammal	52080	51922	99.6966	46632	89.8116
44694	Trachypithecus johnii	VU	Mammal	17100	17048	99.6959	7838	45.9761
21584	Telmatobius peruvianus	VU	Amphibian	8630	8603	99.6871	6327	73.314
13896	Moschus fuscus	EN	Mammal	204095	203439	99.6786	109688	53.9169
22700936	Cephalopterus penduliger	VU	Bird	90503	90209	99.6751	55891	61.756
39879	Hylobates albibarbis	EN	Mammal	185170	184565	99.6733	74076	40.1355
18724	Pteropus fundatus	EN	Mammal	305	304	99.6721	0	0
22691729	Ducula finschii	NT	Bird	42670	42526	99.6625	24826	58.1814
22691668	Ducula aurorae	EN	Bird	294	293	99.6599	161	54.7619
5760	Cryptoprocta ferox	VU	Mammal	444408	442857	99.651	324857	73.3548
16218	Pardofelis marmorata	NT	Mammal	1290936	1286369	99.6462	540427	42.0118
22678360	Penelope ortoni	EN	Bird	77497	77218	99.64	38892	50.1852
22706569	Coracina newtoni	CR	Bird	540	538	99.6296	241	44.6296
22726309	Trichoglossus weberi	NT	Bird	13708	13657	99.628	11806	86.1249
57466	Gephyromantis blanci	NT	Amphibian	18168	18100	99.6257	9900	54.4914
6683	Dipodomys nitratoides	VU	Mammal	11289	11246	99.6191	9985	88.7871
15933	Pan troglodytes	EN	Mammal	2323599	2314734	99.6185	864275	37.338
22679430	Afropavo congensis	VU	Bird	702180	699479	99.6153	219479	31.2568
7949	Equus africanus	CR	Mammal	78663	78359	99.6135	32514	41.4936
22684800	Cacatua goffiniana	NT	Bird	3955	3939	99.5954	2629	66.4728
22686296	Amazona brasiliensis	VU	Bird	4682	4663	99.5942	2743	58.5861
54507	Atelopus eusebianus	CR	Amphibian	725	722	99.5862	722	99.5862
4217	Cercopithecus erythrogaster	VU	Mammal	73862	73555	99.5844	48440	65.8555
18719	Pteropus caniceps	VU	Mammal	21599	21509	99.5833	13571	63.0945
22691794	Ducula cineracea	NT	Bird	3518	3503	99.5736	2965	84.2808
57363	Telmatobius stephani	EN	Amphibian	1159	1154	99.5686	242	20.8801
22680592	Turnix everetti	VU	Bird	10655	10609	99.5683	9990	93.7588
56984	Pristimantis sulculus	EN	Amphibian	461	459	99.5662	260	56.3991
22728296	Amazona lilacina	EN	Bird	67138	66844	99.5621	55181	82.1904
16750	Petrogale xanthopus	NT	Mammal	24181	24075	99.5616	7707	32.0125
22684784	Cacatua moluccensis	VU	Bird	18351	18270	99.5586	14977	81.6141
22715675	Garrulax bieti	VU	Bird	23475	23371	99.557	12571	53.5506
16129	Paramesotriton deloustali	VU	Amphibian	23625	23518	99.5471	14847	62.8444
6090	Cynomys parvidens	EN	Mammal	7492	7457	99.5328	3996	53.5872
55203	Oophaga sylvatica	NT	Amphibian	37445	37270	99.5326	19302	51.5476
39780	Pongo abelii	CR	Mammal	17200	17119	99.5291	3260	19.0432
21472	Tapirus indicus	EN	Mammal	86511	86096	99.5203	28562	33.1746
54590	Rhaebo blombergi	NT	Amphibian	22991	22880	99.5172	8079	35.1398
12271	Lonchorhina fernandezi	EN	Mammal	24199	24082	99.5165	241	1.00075
22734320	Pomarea mendozae	EN	Bird	826	822	99.5157	0	0
21378	Tamiasciurus mearnsi	EN	Mammal	409	407	99.511	42	10.3194
22679655	Odontophorus hyperythrus	NT	Bird	60894	60595	99.509	53575	87.9808
22691744	Ducula brenchleyi	VU	Bird	12667	12604	99.5026	7984	63.0299
22682535	Rhyticeros everetti	VU	Bird	10665	10611	99.4937	9992	93.6896
21207	Sylvilagus insonus	EN	Mammal	1181	1175	99.492	356	30.2979
12753	Mandrillus leucophaeus	EN	Mammal	43388	43167	99.4906	18267	42.317
11617	Lepilemur edwardsi	EN	Mammal	9062	9015	99.4814	7565	83.9157
39826	Pygathrix nemaeus	EN	Mammal	90447	89977	99.4804	36840	40.9438
18720	Pteropus chrysoproctus	NT	Mammal	28535	28380	99.4568	21639	76.2474
22691307	Ptilinopus dohertyi	VU	Bird	10673	10615	99.4566	9995	93.6475
15188	Okapia johnstoni	EN	Mammal	266117	264658	99.4517	66658	25.1865
22044	Trachypithecus laotum	VU	Mammal	5628	5597	99.4492	1457	26.0318
22715353	Phylloscopus ijimae	VU	Bird	157195	156322	99.4446	123503	78.5667
10053	Hippocamelus antisensis	VU	Mammal	452713	450124	99.4281	340385	75.6203
4227	Allochrocebus preussi	EN	Mammal	17337	17237	99.4232	6037	35.0235
55492	Isthmohyla graceae	CR	Amphibian	1890	1879	99.418	809	42.8042
12650	Macrotis lagotis	VU	Mammal	278223	276603	99.4177	65447	23.661
22714933	Chloropeta gracilirostris	VU	Bird	99401	98816	99.4115	67914	68.3233
39956	Chiropotes satanas	CR	Mammal	272666	271061	99.4114	124056	45.7668
22692737	Cyanolimnas cerverai	CR	Bird	1013	1007	99.4077	63	6.21915
15955	Panthera tigris	EN	Mammal	1232609	1225140	99.394	482968	39.4215
12754	Mandrillus sphinx	VU	Mammal	321920	319968	99.3936	110038	34.3903
12570	Macaca hecki	VU	Mammal	23759	23614	99.3897	13709	58.0545
21474	Tapirus terrestris	VU	Mammal	7979159	7929960	99.3834	4100540	51.7095
22679545	Agelastes meleagrides	VU	Bird	69197	68767	99.3786	21567	31.1675
57475	Gephyromantis decaryi	NT	Amphibian	20115	19990	99.3786	11110	55.2324
41778	Tayassu pecari	VU	Mammal	8010188	7960301	99.3772	4013971	50.4249
56925	Craugastor rostralis	NT	Amphibian	1748	1737	99.3707	1008	57.6659
41232	Limnonectes visayanus	VU	Amphibian	5834	5797	99.3658	4407	75.5399
12375	Loris tardigradus	EN	Mammal	15226	15126	99.3432	13466	89.0255
45014473	Goura scheepmakeri	VU	Bird	112107	111370	99.3426	48770	43.5031
22714468	Bradypterus graueri	EN	Bird	19912	19781	99.3421	10101	50.7282
3128	Bubalus quarlesi	EN	Mammal	66240	65804	99.3418	27548	41.8637
58254	Conraua robusta	VU	Amphibian	12449	12367	99.3413	6177	49.6184
22682491	Penelopides mindorensis	EN	Bird	8510	8453	99.3302	7383	86.7568
11933	Liberiictis kuhni	VU	Mammal	74870	74368	99.3295	15168	20.3959
22691710	Ducula pickeringii	VU	Bird	2827	2808	99.3279	2229	78.8468
21489	Tarsius dentatus	VU	Mammal	33735	33502	99.3093	18613	55.5579
19597	Rhinopithecus bieti	EN	Mammal	29797	29591	99.3087	17991	60.7989
20468	Speothos venaticus	NT	Mammal	8243821	8186405	99.3035	4522775	55.2474
6429	Dendrolagus goodfellowi	EN	Mammal	115663	114856	99.3023	31556	27.4744
12427	Lutrogale perspicillata	VU	Mammal	4858790	4824605	99.2964	3697985	76.6485
4015	Catagonus wagneri	EN	Mammal	242983	241266	99.2934	94976	39.3657
22723269	Compsospiza garleppi	EN	Bird	13582	13484	99.2785	10284	75.7179
18750	Pteropus pohlei	VU	Mammal	2484	2466	99.2754	1186	48.0941
57412	Boophis majori	VU	Amphibian	3140	3117	99.2675	1047	33.3439
22697583	Balaeniceps rex	VU	Bird	1295144	1285578	99.2614	948168	73.2095
6426	Dendrolagus bennettianus	NT	Mammal	2567	2548	99.2598	435	17.0722
2892	Bos mutus	VU	Mammal	47781	47424	99.2528	8434	17.7842
22708579	Myadestes obscurus	VU	Bird	6910	6858	99.2475	2568	37.1635
15975	Papagomys armandvillei	NT	Mammal	13704	13600	99.2411	11749	86.3897
56945	Pristimantis sanctaemartae	NT	Amphibian	4279	4246	99.2288	3415	79.8084
20474	Spermophilus mohavensis	VU	Mammal	17203	17069	99.2211	9320	54.6019
19594	Rhinopithecus avunculus	CR	Mammal	10258	10177	99.2104	5577	54.8
22678593	Megapodius bernsteinii	VU	Bird	4035	4003	99.2069	3212	79.6035
55871	Plectrohyla avia	CR	Amphibian	2618	2597	99.1979	1297	49.5416
56571	Pristimantis duellmani	VU	Amphibian	6228	6178	99.1972	3938	63.2306
58168	Xenopus amieti	NT	Amphibian	8446	8378	99.1949	4568	54.0848
22706266	Paradisaea rudolphi	VU	Bird	47995	47606	99.1895	18006	37.5164
54405	Cardioglossa melanogaster	VU	Amphibian	730	724	99.1781	263	36.0274
914	Alouatta pigra	EN	Mammal	237293	235341	99.1774	108841	46.2482
55918	Ptychohyla spinipollex	EN	Amphibian	476	472	99.1597	128	26.8908
18306	Caracal aurata	VU	Mammal	4080377	4045958	99.1565	1613509	39.8795
1793	Aonyx capensis	NT	Mammal	11482267	11383298	99.1381	8283511	72.769
18503	Pseudochirops albertisii	NT	Mammal	22101	21909	99.1313	6237	28.4678
22685572	Ara rubrogenys	EN	Bird	25070	24852	99.1304	21432	85.4886
40596	Carpitalpa arendsi	VU	Mammal	9890	9804	99.1304	8174	83.3741
39838	Semnopithecus hypoleucos	VU	Mammal	13449	13332	99.13	7012	52.5953
13923	Mungotictis decemlineata	EN	Mammal	13306	13190	99.1282	9680	73.3889
9674	Prolemur simus	CR	Mammal	1717	1702	99.1264	788	46.2985
22691568	Ptilinopus arcanus	CR	Bird	114	113	99.1228	48	42.1053
22686411	Amazona imperialis	EN	Bird	223	221	99.1031	40	17.9372
22722567	Bangsia melanochlamys	VU	Bird	8281	8206	99.0943	6046	73.0105
54916	Centrolene heloderma	CR	Amphibian	5160	5113	99.0891	4073	78.9341
12555	Macaca nemestrina	VU	Mammal	1270716	1259081	99.0844	693877	55.1098
57439	Mantella bernhardi	EN	Amphibian	11122	11020	99.0829	7480	67.2541
136732	Dendrolagus notatus	EN	Mammal	85511	84723	99.0785	30723	36.2629
9676	Hapalemur alaotrensis	CR	Mammal	217	215	99.0783	135	62.7907
12847	Martes gwatkinsii	VU	Mammal	30835	30550	99.0757	14350	46.9722
2816	Biswamoyopterus biswasi	CR	Mammal	3782	3747	99.0746	1367	36.4825
18847	Pudu mephistophiles	VU	Mammal	130098	128892	99.073	84464	65.5308
39944	Callicebus medemi	VU	Mammal	15771	15624	99.0679	3288	21.0445
22690195	Columba argentina	CR	Bird	14206	14072	99.0567	9812	69.0694
136497	Manis culionensis	EN	Mammal	13272	13146	99.0506	8326	63.3349
14519	Neofelis nebulosa	VU	Mammal	1890753	1872783	99.0496	1063778	56.802
22679650	Odontophorus atrifrons	VU	Bird	2419	2396	99.0492	1816	75.0723
12722	Mallomys gunung	EN	Mammal	940	931	99.0426	55	5.90763
3169	Anaxyrus exsul	VU	Amphibian	104	103	99.0385	52	50
43892	Chiropotes utahickae	EN	Mammal	250504	248020	99.0084	108410	43.7102
61901	Bolitoglossa sombra	VU	Amphibian	197	195	98.9848	61	30.9645
54531	Atelopus nahumae	EN	Amphibian	391	387	98.977	234	59.8465
10543	Hylobates agilis	EN	Mammal	380408	376502	98.9732	258642	68.696
55330	Gastrotheca dendronastes	VU	Amphibian	3362	3327	98.959	2257	67.1327
22695323	Spilornis elgini	NT	Bird	4685	4636	98.9541	2196	46.873
173018	Nyctibatrachus dattatreyaensis	CR	Amphibian	95	94	98.9474	91	95.7895
41567	Pithecia albicans	VU	Mammal	56948	56348	98.9464	2650	4.70292
22713830	Apalis karamojae	VU	Bird	35858	35480	98.9458	26491	73.8775
6082	Cynogale bennettii	EN	Mammal	1057178	1045999	98.9426	609194	58.2404
6924	Atelocynus microtis	NT	Mammal	1450428	1435042	98.9392	202552	14.1147
2828	Blastocerus dichotomus	VU	Mammal	3910878	3869302	98.9369	2778678	71.8134
41040	Cophixalus neglectus	EN	Amphibian	563	557	98.9343	51	9.05861
22040	Trachypithecus phayrei	EN	Mammal	1152573	1140260	98.9317	715217	62.724
57968	Plethodontohyla brevipes	VU	Amphibian	4558	4509	98.925	1719	37.7139
57524	Gephyromantis striatus	VU	Amphibian	10532	10418	98.9176	1878	17.8314
18129	Presbytis melalophos	EN	Mammal	286374	283257	98.9116	203720	71.9206
12304	Lontra longicaudis	NT	Mammal	11687803	11559959	98.9062	6858329	59.3283
21473	Tapirus pinchaque	EN	Mammal	48401	47870	98.9029	28616	59.7786
4218	Cercopithecus erythrotis	VU	Mammal	56082	55463	98.8963	25163	45.369
22698017	Pterodroma sandwichensis	VU	Bird	901	891	98.8901	417	46.2819
22732795	Struthio molybdophanes	VU	Bird	1084689	1072640	98.8892	785778	72.4427
18739	Pteropus melanopogon	EN	Mammal	53113	52517	98.8779	35158	66.9459
14868	Notomys cervinus	NT	Mammal	47556	47020	98.8729	7950	16.9077
4074	Cebus xanthosternos	CR	Mammal	459896	454678	98.8654	371836	81.7801
16710	Peroryctes broadbenti	EN	Mammal	31537	31175	98.8521	12375	39.6953
22692966	Mesitornis unicolor	VU	Bird	37352	36912	98.822	9112	24.3949
55501	Plectrohyla hazelae	CR	Amphibian	503	497	98.8072	185	36.7793
12305	Lontra provocax	EN	Mammal	80450	79489	98.8055	32061	40.3339
7960	Equus zebra	VU	Mammal	90400	89311	98.7954	39295	43.9979
22708119	Picathartes oreas	VU	Bird	383630	378983	98.7887	119982	31.2754
6431	Dendrolagus inustus	VU	Mammal	119522	118073	98.7877	44231	37.4607
17629	Plethodon shenandoah	VU	Amphibian	247	244	98.7854	137	55.4656
57367	Telmatobius verrucosus	VU	Amphibian	5099	5037	98.7841	2977	58.384
8204	Eulemur albifrons	EN	Mammal	18254	18032	98.7838	3532	19.5874
13894	Moschus berezovskii	EN	Mammal	1611671	1592041	98.782	1264993	79.4573
22692548	Rougetius rougetii	NT	Bird	346985	342723	98.7717	204708	58.9962
22685772	Rhynchopsitta terrisi	EN	Bird	12929	12769	98.7625	8759	67.7469
22692039	Balearica pavonina	VU	Bird	2975730	2938226	98.7397	2323869	78.0941
14296	Naemorhedus goral	NT	Mammal	246690	243558	98.7304	135330	55.5638
10826	Indri indri	CR	Mammal	30254	29868	98.7241	9568	32.0343
54965	Nymphargus griffithsi	VU	Amphibian	8977	8862	98.7189	4752	52.9353
57442	Mantella crocea	EN	Amphibian	234	231	98.7179	96	41.0256
55182	Ranitomeya fantastica	NT	Amphibian	5356	5287	98.7117	1137	21.2285
22683310	Todiramphus lazuli	NT	Bird	18064	17830	98.7046	14567	80.6411
4137	Cephalophus adersi	CR	Mammal	2291	2261	98.6905	1540	68.1115
22684502	Eos histrio	EN	Bird	1526	1506	98.6894	1189	77.9161
136552	Zaglossus bartoni	VU	Mammal	171680	169428	98.6883	44885	26.4921
22684789	Cacatua alba	EN	Bird	25006	24672	98.6643	15304	61.2013
11620	Lepilemur mustelinus	NT	Mammal	25878	25530	98.6552	14130	55.3467
22679312	Catreus wallichii	VU	Bird	210814	207975	98.6533	147567	69.9987
55353	Gastrotheca plumbea	VU	Amphibian	8267	8155	98.6452	5927	71.6947
18740	Pteropus melanotus	VU	Mammal	6644	6553	98.6303	5203	79.3987
39877	Hoolock leuconedys	VU	Mammal	275006	271152	98.5986	132907	49.0157
19564	Rhinolophus rufus	NT	Mammal	34138	33655	98.5852	27467	81.6134
22918	Varecia variegata	CR	Mammal	9784	9645	98.5793	2155	22.3432
59409	Thorius boreas	EN	Amphibian	138	136	98.5507	84	60.8696
11634	Leporillus conditor	NT	Mammal	620	611	98.5484	216	35.3519
57518	Gephyromantis salegy	VU	Amphibian	4063	4004	98.5479	194	4.7748
55885	Plectrohyla sagorum	EN	Amphibian	3098	3053	98.5474	1543	49.8063
22684473	Neomorphus radiolosus	EN	Bird	18152	17885	98.5291	8261	45.5101
54911	Centrolene geckoideum	VU	Amphibian	8108	7988	98.52	7637	94.1909
9404	Gorilla gorilla	CR	Mammal	683987	673857	98.519	177132	26.2863
22691705	Ducula rosacea	NT	Bird	66288	65306	98.5186	56829	85.7304
5263	Conraua goliath	EN	Amphibian	69467	68437	98.5173	35337	50.8688
1807	Aotus griseimembra	VU	Mammal	235067	231579	98.5162	221618	95.6987
55601	Hyloscirtus piceigularis	EN	Amphibian	535	527	98.5047	527	98.5047
22696165	Nisaetus bartelsi	EN	Bird	14488	14270	98.4953	7161	49.4271
19705	Rhynchocyon chrysopygus	EN	Mammal	3514	3461	98.4917	3061	88.4426
13895	Moschus chrysogaster	EN	Mammal	1335261	1315105	98.4905	1004331	76.3689
22688130	Loddigesia mirabilis	EN	Bird	1788	1761	98.4899	621	34.7315
14941	Nycticebus pygmaeus	VU	Mammal	463239	456240	98.4891	241102	52.8454
136768	Eonycteris robusta	NT	Mammal	113815	112054	98.4528	85768	76.5417
136263	Lepilemur fleuretae	CR	Mammal	709	698	98.4485	148	21.2034
57999	Scaphiophryne madagascariensis	NT	Amphibian	20854	20530	98.4463	17100	81.9987
29435	Amolops cremnobatus	NT	Amphibian	42035	41380	98.4418	16368	38.939
22716813	Paradoxornis zappeyi	VU	Bird	41154	40506	98.4254	37406	90.8927
22685760	Ognorhynchus icterotis	EN	Bird	146032	143725	98.4202	125258	85.7744
21493	Tarsius sangirensis	EN	Mammal	502	494	98.4064	447	90.4858
22682931	Brachypteracias leptosomus	VU	Bird	39259	38632	98.4029	9532	24.2798
1151	Ammotragus lervia	VU	Mammal	827199	813831	98.3839	337929	41.5232
22823	Ursus maritimus	VU	Mammal	349444	343783	98.38	37243	10.8333
23179	Zaglossus bruijnii	CR	Mammal	73378	72186	98.3755	27882	38.6252
136707	Lepilemur seali	VU	Mammal	7444	7323	98.3745	1183	16.1546
20290	Sminthopsis douglasi	NT	Mammal	47374	46600	98.3662	15800	33.9056
4265	Rucervus eldii	EN	Mammal	83513	82141	98.3571	61134	74.4257
22715770	Liocichla omeiensis	VU	Bird	8217	8082	98.3571	5482	66.7153
59208	Bolitoglossa sooyorum	EN	Amphibian	724	712	98.3425	259	35.7735
19749	Rousettus bidens	VU	Mammal	148815	146324	98.3261	85821	58.6513
57426	Boophis rufioculis	NT	Amphibian	15942	15674	98.3189	8164	51.2106
55338	Gastrotheca guentheri	VU	Amphibian	13558	13328	98.3036	5828	42.9857
22690609	Turacoena modesta	NT	Bird	31415	30875	98.2811	28790	91.6441
18768	Pteropus voeltzkowi	VU	Mammal	870	855	98.2759	731	85.4971
8975	Gazella spekei	EN	Mammal	181540	178400	98.2704	137000	76.7937
22710153	Cochoa azurea	VU	Bird	8538	8389	98.2549	4259	49.8829
54886	Altiphrynoides osgoodi	CR	Amphibian	57	56	98.2456	54	94.7368
22684795	Cacatua haematuropygia	CR	Bird	214469	210691	98.2384	163441	76.2073
54433	Leptodactylodon mertensi	EN	Amphibian	1434	1408	98.1869	772	53.8354
136399	Brachytarsomys villosa	EN	Mammal	606	595	98.1848	0	0
22680199	Anas wyvilliana	EN	Bird	7772	7630	98.1729	4398	56.5878
136019	Ommatotriton ophryticus	NT	Amphibian	267751	262796	98.1494	196575	73.4171
6089	Cynomys mexicanus	EN	Mammal	591	580	98.1387	310	53.4483
3796	Capra nubiana	VU	Mammal	156457	153540	98.1356	65535	42.6827
139	Acerodon jubatus	EN	Mammal	143851	141165	98.1328	108688	76.9936
56634	Eleutherodactylus gryllus	EN	Amphibian	1284	1260	98.1308	1258	97.9751
41690	Arctictis binturong	VU	Mammal	2948207	2892698	98.1172	1587634	54.8842
22697488	Geronticus eremita	CR	Bird	23487	23039	98.0926	18512	78.8181
22728596	Padda fuscata	NT	Bird	24342	23873	98.0733	23203	95.3208
22678544	Crax blumenbachii	EN	Bird	138385	135694	98.0554	118194	85.4095
22678632	Eulipoa wallacei	VU	Bird	48163	47223	98.0483	33413	69.3748
55573	Plectrohyla mykter	EN	Amphibian	1069	1048	98.0355	389	36.3891
22691076	Alopecoenas hoedtii	EN	Bird	27608	27064	98.0296	25449	92.1798
136223	Genetta bourloni	VU	Mammal	147496	144553	98.0047	36550	25.2848
1141	Ammodorcas clarkei	VU	Mammal	94201	92306	97.9883	59906	64.8994
39876	Hoolock hoolock	EN	Mammal	319038	312518	97.9564	175506	56.1587
22727280	Anas albogularis	VU	Bird	4690	4593	97.9318	2223	47.3987
63541	Nanger soemmerringii	VU	Mammal	292334	286268	97.925	174169	60.8412
22681956	Semnornis ramphastinus	NT	Bird	44932	43989	97.9013	31408	69.9012
22720844	Vestiaria coccinea	VU	Bird	4171	4083	97.8902	683	16.375
56950	Pristimantis savagei	NT	Amphibian	2509	2456	97.8876	866	34.5157
54411	Cardioglossa venusta	EN	Amphibian	426	417	97.8873	290	68.0751
22693082	Gallinago nemoricola	VU	Bird	1731169	1694255	97.8677	1110017	64.1195
22684519	Eos cyanogenia	VU	Bird	2736	2677	97.8436	1407	51.4254
39874	Trachypithecus germaini	EN	Mammal	337699	330396	97.8374	180722	54.6986
5826	Ctenomys sociabilis	CR	Mammal	1059	1036	97.8281	305	29.4402
4273	Rusa alfredi	EN	Mammal	1702	1665	97.8261	698	41.9219
54948	Cochranella balionota	VU	Amphibian	7980	7806	97.8195	2576	32.2807
22693065	Scolopax celebensis	NT	Bird	22107	21620	97.7971	5195	23.4993
3326	Bunolagus monticularis	CR	Mammal	77496	75776	97.7805	54951	72.5177
22686337	Amazona oratrix	EN	Bird	191751	187471	97.7679	135554	70.6927
10552	Hylobates pileatus	EN	Mammal	120273	117582	97.7626	61110	51.9722
19334	Rattus hainaldi	EN	Mammal	755	738	97.7483	477	64.6341
9760	Helarctos malayanus	VU	Mammal	1393405	1361954	97.7429	484114	35.5455
22685553	Ara ambiguus	EN	Bird	151030	147587	97.7203	74384	49.2511
3747	Canis rufus	CR	Mammal	3109	3038	97.7163	1108	36.4714
22678795	Ptilopachus nahani	EN	Bird	100188	97893	97.7093	28193	28.1401
55855	Agalychnis lemur	CR	Amphibian	9338	9124	97.7083	4944	52.945
22698648	Pitta kochi	NT	Bird	38558	37665	97.684	21964	56.9635
22679483	Lyrurus mlokosiewiczi	NT	Bird	104457	102037	97.6833	88585	84.8052
54730	Incilius peripatetes	CR	Amphibian	129	126	97.6744	82	63.5659
22685755	Leptosittaca branickii	VU	Bird	44491	43449	97.658	28000	62.9341
22728514	Megapodius geelvinkianus	VU	Bird	2723	2659	97.6497	1399	51.3772
56958	Pristimantis scolodiscus	EN	Amphibian	1658	1619	97.6478	1006	60.6755
54931	Centrolene peristictum	VU	Amphibian	11657	11381	97.6323	6731	57.7421
54514	Atelopus glyphus	CR	Amphibian	337	329	97.6261	65	19.2878
22712318	Hirundo atrocaerulea	VU	Bird	230001	224467	97.5939	169928	73.8814
40637	Ailurops ursinus	VU	Mammal	174146	169911	97.5681	107202	63.093
22685063	Aprosmictus jonquillaceus	NT	Bird	27912	27229	97.553	25155	90.1225
54807	Dendrophryniscus carvalhoi	EN	Amphibian	485	473	97.5258	473	97.5258
22704320	Gymnomyza aubryana	CR	Bird	3188	3109	97.522	879	27.5721
56896	Pristimantis quinquagesimus	VU	Amphibian	5556	5418	97.5162	2526	45.4644
20890	Strigocuscus celebensis	VU	Mammal	167529	163352	97.5067	101743	62.2845
21100	Styloctenium wallacei	NT	Mammal	165144	161003	97.4925	99501	61.8007
22705726	Cyanocorax dickeyi	NT	Bird	13492	13153	97.4874	1553	11.5105
136776	Harpyionycteris celebensis	VU	Mammal	164089	159963	97.4855	98561	61.6149
19762	Rubrisciurus rubriventer	VU	Mammal	164514	160374	97.4835	98971	61.7126
45354985	Lophura edwardsi	CR	Bird	8287	8078	97.478	3828	46.1928
22692211	Rhynochetos jubatus	EN	Bird	3166	3086	97.4732	826	26.0897
22679717	Cyrtonyx ocellatus	VU	Bird	131558	128227	97.468	76027	57.7897
22721153	Xenospiza baileyi	EN	Bird	590	575	97.4576	475	80.5085
14560	Neopteryx frosti	EN	Mammal	6800	6627	97.4559	4107	61.9737
22041	Trachypithecus pileatus	VU	Mammal	306018	298223	97.4528	181213	60.7643
2890	Bos sauveli	CR	Mammal	31637	30831	97.4524	11842	38.4094
57550	Leptobrachium banae	VU	Amphibian	11296	11008	97.4504	4548	40.262
57517	Gephyromantis rivicola	VU	Amphibian	8457	8241	97.4459	1231	14.556
18848	Pudu puda	NT	Mammal	142154	138521	97.4443	74351	53.6749
19474	Rheithrosciurus macrotis	VU	Mammal	648823	632217	97.4406	271977	43.0196
4230	Allochrocebus solatus	VU	Mammal	12213	11900	97.4372	3360	28.2353
136443	Spilocuscus wilsoni	CR	Mammal	2334	2274	97.4293	1144	50.3078
136773	Uromys boeadii	CR	Mammal	2334	2274	97.4293	1144	50.3078
58353	Limnonectes magnus	NT	Amphibian	68254	66498	97.4273	36708	53.7815
39760	Nycticebus menagensis	VU	Mammal	666314	648992	97.4003	284762	43.8776
3413	Cabassous chacoensis	NT	Mammal	409576	398920	97.3983	168010	42.1162
22726315	Trichoglossus rosenbergii	VU	Bird	2344	2283	97.3976	1153	49.1894
22728310	Circus maillardi	EN	Bird	1494	1455	97.3896	985	65.9304
5145	Colobus satanas	VU	Mammal	323905	315429	97.3832	96749	30.6722
22695250	Trigonoceps occipitalis	CR	Bird	7841609	7636145	97.3798	5600490	71.4202
22695336	Eutriorchis astur	EN	Bird	34729	33818	97.3768	7518	21.6476
12310	Lophocebus aterrimus	NT	Mammal	724954	705730	97.3482	235730	33.4023
22685783	Pyrrhura cruentata	VU	Bird	234588	228338	97.3358	204737	87.2751
22697232	Gorsachius magnificus	EN	Bird	1650212	1606107	97.3273	1163817	70.5253
56888	Craugastor punctariolus	EN	Amphibian	3811	3709	97.3235	1799	47.2055
18144	Priodontes maximus	VU	Mammal	6319172	6149088	97.3084	2700788	43.9218
868	Allocebus trichotis	VU	Mammal	43072	41905	97.2906	12805	30.5572
19377	Ratufa bicolor	NT	Mammal	2532577	2463597	97.2763	1459139	59.228
22692046	Balearica regulorum	EN	Bird	3537436	3441031	97.2747	2515356	71.1068
13198	Mertensiella caucasica	VU	Amphibian	24619	23947	97.2704	16937	68.7965
57344	Telmatobius ignavus	EN	Amphibian	512	498	97.2656	323	63.0859
22697021	Ardea insignis	CR	Bird	58209	56613	97.2582	31413	53.9659
39758	Nycticebus bengalensis	VU	Mammal	2043809	1987349	97.2375	1197090	60.2355
56568	Hypodactylus dolops	VU	Amphibian	3367	3272	97.1785	1148	34.0956
22706151	Epimachus fastuosus	VU	Bird	78738	76513	97.1742	22901	29.0851
12568	Macaca nigrescens	VU	Mammal	9555	9281	97.1324	7021	75.6492
59461	Laotriton laoensis	EN	Amphibian	4581	4449	97.1185	2089	45.6014
22680064	Asarcornis scutulata	EN	Bird	1001804	972792	97.104	588259	58.72
40789	Trachypithecus hatinhensis	EN	Mammal	18936	18387	97.1008	8383	45.592
39776	Nomascus gabriellae	EN	Mammal	92666	89972	97.0928	28341	31.4998
44782	Rhinolophus hillorum	NT	Mammal	26755	25973	97.0772	9873	38.0126
54520	Atelopus limosus	EN	Amphibian	444	431	97.0721	55	12.3874
12592	Macrogalidia musschenbroekii	VU	Mammal	33093	32117	97.0507	22360	69.6205
22728282	Geotrygon purpurata	EN	Bird	57398	55705	97.0504	25587	44.5782
8541	Felis margarita	NT	Mammal	2467878	2394302	97.0187	906475	37.8597
15640	Otocolobus manul	NT	Mammal	4181226	4056381	97.0142	2851724	70.3022
3571	Callithrix flaviceps	EN	Mammal	24858	24110	96.9909	21070	87.3911
8969	Gazella dorcas	EN	Mammal	4839233	4693214	96.9826	1752744	37.3463
55103	Hyloxalus lehmanni	NT	Amphibian	77575	75233	96.981	59038	76.1044
22682433	Anthracoceros coronatus	NT	Bird	704979	683659	96.9758	596532	84.617
22686268	Amazona finschi	EN	Bird	111147	107765	96.9572	52065	46.8434
22682510	Aceros nipalensis	VU	Bird	285621	276817	96.9176	115704	40.5096
57041	Pristimantis vicarius	NT	Amphibian	6505	6303	96.8947	4363	67.0715
22678576	Macrocephalon maleo	EN	Bird	145304	140790	96.8934	81688	56.2187
22690173	Columba elphinstonii	VU	Bird	117119	113453	96.8699	86653	73.9871
62293270	Psittacara frontatus	NT	Bird	127614	123617	96.8679	74568	58.4325
17460	Plagiodontia aedium	EN	Mammal	10498	10168	96.8565	8418	82.7891
22713436	Cisticola aberdare	EN	Bird	1271	1231	96.8529	828	65.1456
10141	Hipposideros lamottei	CR	Mammal	413	400	96.8523	263	65.75
55552	Exerodonta melanomma	VU	Amphibian	1333	1291	96.8492	789	59.1898
55460	Plectrohyla cyclada	EN	Amphibian	3072	2975	96.8424	845	27.5065
56488	Pristimantis calcarulatus	VU	Amphibian	3452	3343	96.8424	1713	49.6234
59463	Pleurodeles waltl	NT	Amphibian	379625	367577	96.8263	293001	77.1817
56323	Atelognathus patagonicus	EN	Amphibian	281	272	96.7972	173	61.5658
56697	Craugastor laevissimus	EN	Amphibian	32239	31205	96.7927	19605	60.8114
58592	Pelophylax epeiroticus	VU	Amphibian	12035	11649	96.7927	10509	87.3203
3812	Capricornis sumatraensis	VU	Mammal	127669	123573	96.7917	55058	44.555
58350	Limnonectes macrocephalus	NT	Amphibian	107945	104473	96.7835	83155	77.0346
40636	Pseudantechinus bilarni	NT	Mammal	5424	5249	96.7736	286	5.44866
22691061	Alopecoenas rubescens	VU	Bird	340	329	96.7647	0	0
22695541	Accipiter haplochrous	NT	Bird	16272	15744	96.7552	9174	56.3791
56593	Pristimantis euphronides	EN	Amphibian	92	89	96.7391	80	86.9565
11790	Lepus flavigularis	EN	Mammal	92	89	96.7391	85	95.5056
41305	Lepus corsicanus	VU	Mammal	51780	50088	96.7323	46508	92.8526
22682638	Bucorvus leadbeateri	VU	Bird	4868553	4708622	96.715	3514880	72.1956
22712619	Pycnonotus priocephalus	NT	Bird	99918	96623	96.7023	73523	73.5833
45422600	Pyrrhura caeruleiceps	EN	Bird	21793	21072	96.6916	19992	91.7359
56860	Eleutherodactylus pinchoni	EN	Amphibian	453	438	96.6887	281	62.0309
54599	Anaxyrus californicus	EN	Amphibian	57767	55832	96.6503	29693	51.4013
10032	Choeropsis liberiensis	EN	Mammal	141486	136711	96.6251	35711	26.1215
22679163	Tragopan blythii	VU	Bird	121432	117327	96.6195	42597	35.0789
22732096	Nisaetus floris	CR	Bird	34396	33232	96.6159	24220	70.4152
22692129	Bugeranus carunculatus	VU	Bird	2297132	2219212	96.6079	1558836	67.8601
136517	Rattus satarae	VU	Mammal	3147	3040	96.5999	2248	73.9474
22731941	Anorrhinus austeni	NT	Bird	778284	751714	96.5861	339846	43.6661
56953	Pristimantis schultei	VU	Amphibian	5664	5470	96.5749	1420	25.0706
58000	Scaphiophryne marmorata	VU	Amphibian	12198	11780	96.5732	7360	60.3378
21488	Tarsius bancanus	VU	Mammal	763285	737058	96.5639	349848	47.4655
13215	Mesocapromys angelcabrerai	EN	Mammal	29	28	96.5517	25	89.2857
22721891	Ergaticus versicolor	VU	Bird	17108	16516	96.5396	11436	66.8459
10551	Hylobates muelleri	EN	Mammal	457407	441539	96.5309	196159	44.4262
2994	Brachyteles hypoxanthus	CR	Mammal	97178	93789	96.5126	86139	91.8434
54540	Atelopus petriruizi	CR	Amphibian	315	304	96.5079	156	49.5238
55236	Ameerega silverstonei	EN	Amphibian	742	716	96.496	167	22.5067
22715497	Megalurus albolimbatus	VU	Bird	2396	2312	96.4942	895	37.3539
22691170	Treron floris	VU	Bird	35783	34519	96.4676	25227	70.5
22692181	Heliopais personatus	EN	Bird	494218	476702	96.4558	317591	64.2613
22690985	Gallicolumba platenae	CR	Bird	450	434	96.4444	390	86.6667
58418	Nanorana arnoldi	NT	Amphibian	17566	16941	96.442	2941	16.7426
7750	Enhydra lutris	EN	Mammal	13446	12965	96.4227	987	7.6128
59091	Hynobius boulengeri	VU	Amphibian	10979	10586	96.4204	8376	76.2911
3786	Capra aegagrus	VU	Mammal	1396735	1346539	96.4062	1069686	79.4397
22684123	Phaenicophaeus pyrrhocephalus	VU	Bird	36654	35336	96.4042	27846	75.9699
22727029	Buceros mindanensis	VU	Bird	112963	108884	96.3891	77152	68.2985
18554	Pseudomys oralis	VU	Mammal	21729	20943	96.3827	10583	50.5324
18557	Pseudomys shortridgei	NT	Mammal	26635	25671	96.3807	15921	62.0194
22679035	Arborophila rufipectus	EN	Bird	7734	7453	96.3667	5053	65.3349
45092131	Crax pinima	CR	Bird	294790	284036	96.352	124032	42.0747
12560	Macaca sinica	EN	Mammal	46497	44794	96.3374	32294	72.0945
45470702	Psophia obscura	CR	Bird	228288	219860	96.3082	86854	38.0458
158467	Atelopus patazensis	CR	Amphibian	27	26	96.2963	25	92.5926
219	Acinonyx jubatus	EN	Mammal	3712942	3575311	96.2932	1941123	54.2924
6282	Dasyprocta guamara	NT	Mammal	17017	16377	96.2391	1510	9.22025
22696977	Egretta eulophotes	VU	Bird	843992	812185	96.2314	619138	73.3583
54497	Atelopus certus	EN	Amphibian	106	102	96.2264	9	8.49057
22726297	Treron aromaticus	NT	Bird	8426	8107	96.2141	5887	69.8671
22690974	Caloenas nicobarica	NT	Bird	465176	447488	96.1976	319015	68.5794
55354	Gastrotheca pseustes	EN	Amphibian	12412	11939	96.1892	9718	78.2952
57362	Telmatobius simonsi	NT	Amphibian	52100	50110	96.1804	36410	69.8848
54486	Rhinella chrysophora	EN	Amphibian	861	828	96.1672	19	2.20674
8967	Gazella cuvieri	VU	Mammal	151155	145358	96.1649	101121	69.5669
22697604	Pelecanus philippensis	NT	Bird	3056180	2938544	96.1509	2362493	77.3022
22678815	Pternistis harwoodi	VU	Bird	50182	48248	96.146	25548	50.9107
22684777	Cacatua sulphurea	CR	Bird	255208	245360	96.1412	171334	67.135
4828	Chrysospalax trevelyani	EN	Mammal	40450	38865	96.0816	38388	98.7727
58442	Quasipaa verrucospinosa	NT	Amphibian	56602	54375	96.0655	28851	50.9717
57359	Telmatobius schreiteri	EN	Amphibian	5924	5689	96.0331	849	14.3315
55439	Plectrohyla cembra	CR	Amphibian	252	242	96.0317	30	11.9048
22716480	Turdoides hindei	VU	Bird	24263	23293	96.0021	20617	84.973
22683499	Todiramphus gambieri	CR	Bird	75	72	96	0	0
55173	Oophaga arborea	EN	Amphibian	225	216	96	216	96
22691485	Ptilinopus chalcurus	VU	Bird	25	24	96	23	92
22716326	Chrysomma altirostre	VU	Bird	39037	37475	95.9987	31175	79.8601
22724523	Phapitreron brunneiceps	VU	Bird	95552	91704	95.9729	65072	68.1011
22678379	Penelope perspicax	EN	Bird	15156	14545	95.9686	14204	93.7187
22692109	Anthropoides paradiseus	VU	Bird	889216	853126	95.9414	762958	85.8012
19180	Lithobates subaquavocalis	CR	Amphibian	221	212	95.9276	87	39.3665
135440	Semnopithecus priam	NT	Mammal	239385	229620	95.9208	195307	85.0566
58401	Nyctibatrachus major	VU	Amphibian	14904	14290	95.8803	8330	55.891
54527	Atelopus minutulus	CR	Amphibian	24	23	95.8333	23	95.8333
57352	Telmatobius niger	CR	Amphibian	5991	5741	95.8271	4291	71.6241
22685766	Rhynchopsitta pachyrhyncha	EN	Bird	171533	164371	95.8247	86525	50.4422
59077	Cryptobranchus alleganiensis	NT	Amphibian	513923	492454	95.8225	375379	73.0419
55386	Hyloscirtus alytolylax	NT	Amphibian	33280	31886	95.8113	19260	57.8726
22731946	Anorrhinus tickelli	NT	Bird	160285	153569	95.81	66817	41.6864
5146	Colobus vellerosus	VU	Mammal	478606	458540	95.8074	306887	66.927
22682541	Rhyticeros subruficollis	VU	Bird	72324	69277	95.787	22262	30.7809
55577	Charadrahyla nephila	VU	Amphibian	1701	1629	95.7672	339	19.9295
41784	Axis porcinus	EN	Mammal	363443	348048	95.7641	282411	81.1414
22690991	Gallicolumba crinigera	VU	Bird	93847	89862	95.7537	71362	76.0408
22687699	Anthocephala floriceps	VU	Bird	10538	10090	95.7487	9577	90.8806
22682522	Rhabdotorrhinus leucocephalus	NT	Bird	89975	86084	95.6755	63052	70.0772
56506	Craugastor charadra	EN	Amphibian	2450	2344	95.6735	1411	57.5918
56993	Pristimantis tamsitti	NT	Amphibian	7356	7037	95.6634	5677	77.1751
18230	Procapra przewalskii	EN	Mammal	665	636	95.6391	575	90.4088
22696012	Pithecophaga jefferyi	CR	Bird	144896	138510	95.5927	97734	67.4511
55350	Gastrotheca ovifera	EN	Amphibian	2498	2387	95.5564	1618	64.7718
22691932	Ardeotis nigriceps	CR	Bird	1120604	1070716	95.5481	964470	86.067
22684689	Charmosyna diadema	CR	Bird	3364	3214	95.541	984	29.2509
55098	Colostethus jacobuspetersi	CR	Amphibian	5064	4838	95.5371	4143	81.8128
22711231	Sitta formosa	VU	Bird	377228	360327	95.5197	201039	53.2938
10329	Hydropotes inermis	VU	Mammal	179835	171766	95.5131	141787	82.5466
55432	Isthmohyla calypsa	CR	Amphibian	289	276	95.5017	70	24.2215
22679440	Pavo muticus	EN	Bird	1858357	1774570	95.4913	1118937	60.2111
22679663	Odontophorus melanonotus	VU	Bird	5474	5227	95.4878	2579	47.1136
55810	Osteopilus pulchrilineatus	VU	Amphibian	24282	23183	95.474	19883	81.8837
16971461	Microcebus gerpi	CR	Mammal	22	21	95.4545	5	23.8095
19832	Saiga tatarica	CR	Mammal	732447	699103	95.4476	441290	63.1223
20473	Spermophilus brunneus	EN	Mammal	1274	1216	95.4474	1044	85.8553
12766	Phataginus tetradactyla	VU	Mammal	2707245	2583930	95.445	830535	32.1423
22695207	Gyps rueppelli	EN	Bird	6701900	6395826	95.433	4657109	69.4894
4806	Chrotogale owstoni	EN	Mammal	238767	227846	95.4261	119822	52.589
44166	Aonyx cinereus	VU	Mammal	4681831	4467422	95.4204	2820556	63.1361
22724673	Xanthopsar flavus	VU	Bird	645149	615535	95.4097	547849	84.9182
59054	Ambystoma bombypellum	CR	Amphibian	87	83	95.4023	42	48.2759
22695189	Gyps africanus	CR	Bird	11856605	11306914	95.3638	8159150	68.8152
22690664	Henicophaps foersteri	VU	Bird	31607	30141	95.3618	18141	57.3955
22685416	Loriculus exilis	NT	Bird	102906	98126	95.355	58325	56.6779
57351	Telmatobius necopinus	EN	Amphibian	43	41	95.3488	0	0
58679	Pelophylax nigromaculatus	NT	Amphibian	4307749	4107317	95.3472	3168494	73.5534
22734083	Nisaetus pinskeri	EN	Bird	132323	126145	95.3311	92713	70.0657
22733682	Zoothera erythronota	NT	Bird	173534	165420	95.3243	102904	59.299
57626	Leptobrachium echinatum	EN	Amphibian	684	652	95.3216	370	54.0936
10137	Hipposideros halophyllus	VU	Mammal	23368	22273	95.3141	10573	47.47
54503	Atelopus dimorphus	EN	Amphibian	64	61	95.3125	0	0
59460	Paramesotriton hongkongensis	NT	Amphibian	19236	18334	95.3109	16874	87.7209
22724459	Carpococcyx viridis	CR	Bird	25349	24159	95.3055	10751	42.4119
13969	Mus mayori	VU	Mammal	1128	1075	95.3014	1025	95.3488
59194	Bolitoglossa pesrubra	VU	Amphibian	779	742	95.2503	152	19.5122
19362	Rattus simalurensis	EN	Mammal	1679	1599	95.2353	1307	81.7386
22697536	Thaumatibis gigantea	CR	Bird	24758	23570	95.2016	8170	32.9994
3833	Caprolagus hispidus	EN	Mammal	115037	109515	95.1998	97715	89.2252
22733562	Chlamydotis macqueenii	VU	Bird	10888791	10363195	95.1731	6120267	56.207
8542	Felis nigripes	VU	Mammal	1756890	1671579	95.1442	1092306	65.3458
22692552	Aramidopsis plateni	VU	Bird	172636	164243	95.1383	101941	59.0497
57820	Glyphoglossus molossus	NT	Amphibian	705427	671071	95.1298	454992	64.4988
22726874	Actenoides bougainvillei	EN	Bird	6374	6063	95.1208	4733	74.2548
18150	Prionailurus viverrinus	VU	Mammal	189097	179822	95.0951	152452	84.7794
22726285	Treron phayrei	NT	Bird	1722602	1637125	95.0379	899158	52.1977
58062	Anhydrophryne ngongoniensis	EN	Amphibian	1767	1679	95.0198	1652	93.4918
21975	Tolypeutes tricinctus	VU	Mammal	905527	859893	94.9605	552137	64.21
59103	Hynobius tokyoensis	VU	Amphibian	9822	9327	94.9603	9288	94.5632
56952	Eleutherodactylus schmidti	CR	Amphibian	12077	11463	94.916	10063	83.3237
18358	Propithecus diadema	CR	Mammal	16558	15716	94.9148	5116	32.5528
8997	Genetta johnstoni	NT	Mammal	307904	292171	94.8903	91145	31.1958
39422	Pelodytes caucasicus	NT	Amphibian	22834	21666	94.8848	13916	60.9442
55870	Plectrohyla acanthodes	CR	Amphibian	997	946	94.8847	649	65.0953
22691900	Otis tarda	VU	Bird	10015156	9502434	94.8805	7699301	76.8765
3339	Burramys parvus	CR	Mammal	957	908	94.8798	378	41.63
22727778	Falco chicquera	NT	Bird	3179569	3014070	94.7949	2533340	79.6756
39792	Macaca leonina	VU	Mammal	1500508	1422082	94.7734	724453	50.9431
22715758	Garrulax yersini	EN	Bird	707	670	94.7666	127	17.9632
59032	Theloderma bicolor	EN	Amphibian	591	560	94.7547	267	45.1777
6785	Dolichotis patagonum	NT	Mammal	1189473	1126866	94.7366	611643	54.2782
41707	Viverra megaspila	EN	Mammal	1332716	1262433	94.7263	745947	59.088
4414	Chalinolobus dwyeri	NT	Mammal	516109	488829	94.7143	311949	63.8156
55678	Hyloscirtus torrenticola	VU	Amphibian	3563	3374	94.6955	1343	37.693
57404	Boophis haematopus	EN	Amphibian	2827	2677	94.694	1731	61.231
55186	Oophaga granulifera	VU	Amphibian	5501	5207	94.6555	4468	81.2216
22696221	Sagittarius serpentarius	VU	Bird	14092479	13339174	94.6546	9721533	68.9838
57364	Telmatobius thompsoni	EN	Amphibian	56	53	94.6429	19	33.9286
22713578	Prinia cinereocapilla	VU	Bird	33171	31391	94.6339	25641	77.2994
54526	Atelopus mindoensis	CR	Amphibian	3997	3781	94.5959	1071	26.7951
55257	Aromobates meridensis	CR	Amphibian	203	192	94.5813	192	94.5813
6608	Dinomys branickii	VU	Mammal	1085910	1026967	94.572	244887	23.8457
15089	Octodon lunatus	NT	Mammal	25602	24209	94.559	23169	95.7041
56942	Craugastor saltuarius	CR	Amphibian	294	278	94.5578	7	2.38095
54492	Atelopus bomolochos	CR	Amphibian	11405	10777	94.4936	7094	62.2008
22679023	Arborophila atrogularis	NT	Bird	302198	285552	94.4917	136941	45.315
18741	Pteropus molossinus	VU	Mammal	322	304	94.4099	125	41.1184
59424	Thorius pennatulus	CR	Amphibian	732	691	94.3989	585	79.918
22692920	Fulica alai	VU	Bird	1086	1025	94.3831	849	78.1768
57353	Telmatobius oxycephalus	VU	Amphibian	320	302	94.375	0	0
22735406	Strophocincla fairbanki	NT	Bird	1098	1036	94.3534	258	23.4973
45355372	Lophura inornata	NT	Bird	71882	67781	94.2948	26512	36.8827
18757	Pteropus samoensis	NT	Mammal	13951	13155	94.2943	10255	77.9552
22732272	Circaetus beaudouini	VU	Bird	2472777	2331550	94.2887	1825130	73.8089
18447	Pseudantechinus mimulus	EN	Mammal	4447	4193	94.2883	1150	27.4267
6682	Dipodomys stephensi	EN	Mammal	2954	2785	94.2789	2520	90.4847
59430	Necturus alabamensis	EN	Amphibian	7861	7410	94.2628	5570	70.8561
22697651	Mycteria cinerea	EN	Bird	95866	90338	94.2336	56563	59.0021
22692245	Sarothrura ayresi	CR	Bird	488448	460230	94.2229	436536	89.3721
56497	Pristimantis caryophyllaceus	NT	Amphibian	45119	42507	94.2109	19107	42.348
22694711	Sterna acuticauda	EN	Bird	3560894	3353992	94.1896	2792459	78.4202
2815	Bison bison	NT	Mammal	42545	40071	94.185	12578	31.3893
23324	Zyzomys pedunculatus	CR	Mammal	2939	2768	94.1817	223	8.05636
54548	Atelopus seminiferus	CR	Amphibian	2279	2146	94.1641	16	0.702062
22678398	Penelope jacucaca	VU	Bird	612690	576762	94.136	409950	66.9099
22679147	Tragopan melanocephalus	VU	Bird	21640	20370	94.1312	11340	52.403
13597	Mixophyes fleayi	EN	Amphibian	16802	15814	94.1197	11184	66.5635
22720310	Neospiza concolor	CR	Bird	85	80	94.1176	46	54.1176
22716588	Alcippe variegaticeps	VU	Bird	155851	146659	94.1021	115259	73.9546
22724813	Psittacus erithacus	VU	Bird	2767087	2603186	94.0768	919770	33.2396
22700773	Zaratornis stresemanni	VU	Bird	73287	68936	94.0631	51140	69.7805
22035	Trachypithecus cristatus	NT	Mammal	1124483	1057365	94.0312	546975	51.73
22698611	Pitta schneideri	VU	Bird	66263	62307	94.0299	23840	35.9778
16888	Phascogale calura	NT	Mammal	43970	41343	94.0255	25215	60.9898
55137	Hyloxalus pulchellus	VU	Amphibian	17473	16421	93.9793	9590	54.8847
22710150	Cochoa beccarii	VU	Bird	64799	60897	93.9783	23469	36.2182
22697713	Leptoptilos javanicus	VU	Bird	3074155	2888984	93.9765	2226903	72.4395
22697237	Gorsachius goisagi	EN	Bird	740257	695531	93.958	517095	69.8534
1794	Aonyx congicus	NT	Mammal	2911683	2735758	93.958	932481	34.0849
22715480	Locustella pryeri	NT	Bird	394840	370932	93.9449	315267	79.8468
54500	Atelopus chrysocorallus	CR	Amphibian	66	62	93.9394	62	93.9394
22682961	Atelornis crossleyi	NT	Bird	22566	21196	93.9289	3596	15.9355
10591	Hylomyscus baeri	EN	Mammal	54329	51025	93.9185	23425	45.9089
57445	Mantella laevigata	NT	Amphibian	20811	19545	93.9167	7445	35.7744
22693876	Charadrius montanus	NT	Bird	1640712	1540689	93.9037	948822	57.8299
7140	Elephas maximus	EN	Mammal	589766	553800	93.9016	266468	48.1163
14020	Mustela nigripes	EN	Mammal	1588	1491	93.8917	653	43.7961
39779	Symphalangus syndactylus	EN	Mammal	332625	312161	93.8477	196210	62.8554
22724748	Cyrtonyx sallei	NT	Bird	92218	86534	93.8363	28634	31.0503
22711924	Parus nuchalis	VU	Bird	66895	62755	93.8112	55391	82.8029
16722	Petaurista nobilis	NT	Mammal	29442	27619	93.8082	10293	37.2678
57970	Rhombophryne coudreaui	NT	Amphibian	14727	13810	93.7733	4610	31.303
22680652	Indicator xanthonotus	NT	Bird	97647	91549	93.7551	39181	40.1251
22693992	Vanellus duvaucelii	NT	Bird	1670789	1566065	93.7321	1200983	71.8812
57361	Telmatobius sibiricus	EN	Amphibian	3462	3245	93.7319	665	19.2085
22684564	Trichoglossus rubiginosus	NT	Bird	335	314	93.7313	134	40
55909	Ptychohyla erythromma	EN	Amphibian	2293	2149	93.72	529	23.0702
18581	Pseudophryne bibronii	NT	Amphibian	667933	625913	93.7089	473150	70.8379
56947	Pristimantis sanguineus	NT	Amphibian	3880	3635	93.6856	985	25.3866
22679336	Syrmaticus mikado	NT	Bird	13829	12955	93.6799	3285	23.7544
20492	Spermophilus suslicus	NT	Mammal	791620	741094	93.6174	691913	93.3637
2434	Avahi laniger	VU	Mammal	50932	47667	93.5895	17867	37.483
47144519	Rhacophorus helenae	EN	Amphibian	311	291	93.5691	58	18.6495
6292	Dasypus sabanicola	NT	Mammal	390704	365454	93.5373	275399	75.358
61751	Incilius cycladen	VU	Amphibian	6972	6521	93.5313	1321	18.9472
14581	Neotoma magister	NT	Mammal	314095	293725	93.5147	215225	73.2743
6295	Dasyurus hallucatus	EN	Mammal	216390	202283	93.4808	83113	41.0875
55465	Ptychohyla dendrophasma	CR	Amphibian	46	43	93.4783	0	0
15330	Onychogalea fraenata	VU	Mammal	3433	3209	93.4751	1107	34.4967
41790	Rusa unicolor	VU	Mammal	7476476	6985199	93.429	5038830	72.1358
56451	Eleutherodactylus barlagnei	EN	Amphibian	365	341	93.4247	205	56.1644
22692015	Houbaropsis bengalensis	CR	Bird	260542	243391	93.4172	212391	81.5189
55466	Bromeliohyla dendroscarta	CR	Amphibian	1839	1717	93.366	1212	65.9054
22678615	Megapodius layardi	VU	Bird	6586	6149	93.3647	4436	67.355
22727019	Buceros hydrocorax	VU	Bird	78173	72982	93.3596	53041	67.8508
8371	Euproctus platycephalus	EN	Amphibian	2027	1891	93.2906	1366	67.3902
23178	Zaedyus pichiy	NT	Mammal	1272772	1187280	93.283	578400	48.7164
22736498	Psittacus timneh	VU	Bird	293383	273560	93.2433	90557	30.8665
54646	Rhinella gallardoi	EN	Amphibian	1522	1419	93.2326	169	11.1038
2297	Atelognathus reverberii	VU	Amphibian	1180	1100	93.2203	0	0
56007	Smilisca cyanosticta	NT	Amphibian	29027	27059	93.2201	11159	38.4435
22686311	Alipiopsitta xanthops	NT	Bird	2008058	1871342	93.1916	1385542	68.9991
22686403	Amazona guildingii	VU	Bird	44	41	93.1818	23	52.2727
54752	Rhinella rumbolli	VU	Amphibian	5055	4710	93.1751	1040	20.5737
22696712	Anhinga melanogaster	NT	Bird	6869138	6400242	93.1739	4711011	68.5823
55523	Exerodonta juanitae	VU	Amphibian	2689	2504	93.1201	1031	38.3414
14872	Notophthalmus perstriatus	NT	Amphibian	60184	56010	93.0646	37399	62.1411
57036	Pristimantis verecundus	VU	Amphibian	3046	2834	93.0401	1256	41.2344
22678357	Penelope barbata	VU	Bird	24195	22510	93.0358	10910	45.092
22679029	Arborophila mandellii	VU	Bird	67178	62458	92.9739	23296	34.678
22679668	Odontophorus speciosus	NT	Bird	428417	398292	92.9683	162025	37.8195
22697531	Pseudibis davisoni	CR	Bird	48552	45135	92.9622	22026	45.3658
6713	Discoglossus jeanneae	NT	Amphibian	188130	174746	92.8858	128798	68.4622
15967	Pantholops hodgsonii	NT	Mammal	474111	440357	92.8806	182757	41.502
22042	Trachypithecus vetulus	EN	Mammal	37109	34465	92.875	26675	77.3974
21532	Taudactylus liemi	NT	Amphibian	350	325	92.8571	196	56
8203	Eulemur rubriventer	VU	Mammal	50191	46590	92.8254	12290	26.3791
22685473	Psittacula finschii	NT	Bird	1647459	1528876	92.8021	813552	49.3822
22034	Trachypithecus auratus	VU	Mammal	131177	121700	92.7754	99079	81.4125
15739	Ovis orientalis	EN	Mammal	2156088	2000133	92.7668	1312220	65.6066
56534	Pristimantis crucifer	VU	Amphibian	4744	4400	92.7487	2136	45.0253
22710172	Saxicola insignis	VU	Bird	379729	352015	92.7016	285001	75.0538
22679050	Arborophila gingica	NT	Bird	398071	368953	92.6852	182953	45.9599
59401	Pseudoeurycea unguidentis	CR	Amphibian	41	38	92.6829	0	0
22711392	Ferminia cerverai	EN	Bird	1564	1449	92.6471	39	2.49361
22690804	Columbina cyanopis	CR	Bird	680147	630126	92.6456	561526	82.5595
22695238	Torgos tracheliotos	EN	Bird	9460769	8764976	92.6455	5833175	61.6565
22685486	Psittacula roseata	NT	Bird	1702037	1576827	92.6435	905987	53.2296
55211	Andinobates virolinensis	EN	Amphibian	2474	2292	92.6435	2279	92.118
21531	Taudactylus eungellensis	CR	Amphibian	339	314	92.6254	187	55.1622
2283	Ateles paniscus	VU	Mammal	474976	439942	92.624	40312	9.16303
41689	Hemigalus derbyanus	NT	Mammal	1260168	1167037	92.6096	600907	51.49
22697721	Leptoptilos dubius	EN	Bird	803400	743901	92.5941	522870	65.0822
22723487	Sporophila palustris	EN	Bird	1177174	1089836	92.5807	948306	80.5578
55358	Gastrotheca ruizi	EN	Amphibian	121	112	92.562	39	32.2314
22685009	Tanygnathus lucionensis	NT	Bird	289924	268346	92.5574	204129	70.4078
22695855	Buteogallus coronatus	EN	Bird	4253459	3936551	92.5494	2735470	64.3117
22723036	Charitospiza eucosma	NT	Bird	2063346	1909117	92.5253	1522767	73.8009
56600	Pristimantis fetosus	EN	Amphibian	266	246	92.4812	230	86.4662
22708108	Picathartes gymnocephalus	VU	Bird	391375	361948	92.4811	137880	35.2296
56807	Craugastor olanchano	CR	Amphibian	597	552	92.4623	138	23.1156
22696802	Phalacrocorax nigrogularis	VU	Bird	2422	2239	92.4443	1957	80.801
22691663	Ducula oceanica	NT	Bird	1005	929	92.4378	590	58.7065
8976	Gazella subgutturosa	CR	Mammal	8656013	8000516	92.4273	3970756	49.6312
55594	Plectrohyla pentheter	EN	Amphibian	2309	2134	92.421	1204	52.1438
54491	Atelopus balios	CR	Amphibian	381	352	92.3885	352	92.3885
136569	Macaca munzala	EN	Mammal	1734	1602	92.3875	605	37.7653
39761	Nycticebus javanicus	CR	Mammal	64551	59630	92.3766	45367	76.0808
22692073	Antigone vipio	VU	Bird	867435	800963	92.3369	500193	57.6635
54493	Atelopus boulengeri	CR	Amphibian	2400	2216	92.3333	882	36.75
22680127	Salvadorina waigiuensis	VU	Bird	340758	314574	92.316	84282	24.7337
22680214	Anas luzonica	VU	Bird	278926	257477	92.3101	195460	70.0759
55917	Ptychohyla sanctaecrucis	CR	Amphibian	78	72	92.3077	0	0
10350	Hyla andersonii	NT	Amphibian	67246	62007	92.2092	48607	72.2824
22719736	Erythrura regia	VU	Bird	11440	10544	92.1678	7436	65
2783	Bettongia gaimardi	NT	Mammal	26942	24825	92.1424	17032	68.6083
56699	Pristimantis lancinii	EN	Amphibian	445	410	92.1348	410	92.1348
18102	Potorous longipes	VU	Mammal	2644	2435	92.0953	556	22.8337
5224	Conilurus penicillatus	VU	Mammal	129452	119197	92.0781	22730	19.0693
22678280	Nothura minor	VU	Bird	1114227	1025958	92.078	921096	82.6668
136255	Thylogale lanatus	EN	Mammal	1347	1240	92.0564	0	0
54504	Atelopus ebenoides	CR	Amphibian	1924	1771	92.0478	1703	88.5135
59441	Cynops ensicauda	EN	Amphibian	1659	1527	92.0434	1426	85.9554
12762	Smutsia gigantea	VU	Mammal	3175219	2921926	92.0228	946969	32.4091
22684733	Zanda latirostris	EN	Bird	248702	228846	92.0161	139836	56.2263
22679929	Branta sandvicensis	VU	Bird	6632	6101	91.9934	2361	35.6001
57325	Telmatobius atahualpai	NT	Amphibian	5945	5468	91.9765	1988	33.4399
22691611	Ducula poliocephala	NT	Bird	265875	244406	91.9252	188389	70.8562
22697516	Threskiornis melanocephalus	NT	Bird	2832590	2601828	91.8533	2062613	72.8172
13211	Mesembriomys gouldii	VU	Mammal	121929	111942	91.8092	25942	23.1745
55349	Gastrotheca orophylax	EN	Amphibian	2478	2275	91.8079	492	19.8547
56445	Craugastor azueroensis	EN	Amphibian	1502	1378	91.7443	686	45.6724
56725	Eleutherodactylus locustus	CR	Amphibian	506	464	91.6996	464	91.6996
22727349	Scleroptila elgonensis	NT	Bird	18338	16814	91.6894	12032	65.6124
22723499	Sporophila cinnamomea	VU	Bird	1489407	1365583	91.6864	1097583	73.6926
4652	Chinchilla lanigera	EN	Mammal	24493	22450	91.6588	21311	94.9265
22723495	Sporophila hypochroma	NT	Bird	1608149	1473559	91.6308	1069289	66.4919
54487	Atelopus andinus	CR	Amphibian	2424	2220	91.5842	0	0
136285	Avahi peyrierasi	VU	Mammal	4401	4030	91.5701	1260	31.2655
22047	Tragelaphus eurycerus	NT	Mammal	2129793	1949598	91.5393	589905	30.2578
22691227	Treron sanctithomae	VU	Bird	836	765	91.5072	442	52.8708
22716693	Crocias albonotatus	NT	Bird	2860	2617	91.5035	977	34.1608
22694268	Rynchops albicollis	VU	Bird	1407380	1287545	91.4852	1118009	79.439
22736440	Chasiempis sandwichensis	VU	Bird	9413	8610	91.4692	2990	31.7646
136384	Hapalemur meridionalis	VU	Mammal	6572	6011	91.4638	2011	33.4553
57505356	Gastrotheca aguaruna	NT	Amphibian	2232	2041	91.4427	821	36.7832
136113	Rana draytonii	VU	Amphibian	138235	126405	91.4421	85797	62.066
3815	Capricornis rubidus	NT	Mammal	85157	77861	91.4323	25550	32.8149
57853	Kaloula mediolineata	NT	Amphibian	215608	197111	91.421	159411	73.9356
22704412	Grantiella picta	VU	Bird	1223699	1118170	91.3762	610270	49.8709
55121	Silverstoneia nubicola	NT	Amphibian	69717	63697	91.3651	18097	25.9578
15571	Oryx beisa	NT	Mammal	1081768	988312	91.3608	665471	67.3341
22691024	Alopecoenas kubaryi	VU	Bird	393	359	91.3486	178	45.2926
22691634	Ducula carola	VU	Bird	222672	203376	91.3343	153259	68.8272
22719008	Ploceus hypoxanthus	NT	Bird	812101	741684	91.329	567460	69.8755
58687	Lithobates omiltemanus	CR	Amphibian	1095	1000	91.3242	225	20.5479
8212	Eulemur macaco	VU	Mammal	8025	7327	91.3022	2577	35.1713
22727999	Ramphastos ambiguus	NT	Bird	597711	545441	91.255	334897	56.0299
15452	Leopardus jacobita	EN	Mammal	505551	461063	91.2001	295368	64.0624
22727425	Lophura pyronota	VU	Bird	582705	531377	91.1914	248917	42.7175
22682050	Andigena laminirostris	NT	Bird	14433	13159	91.173	7742	53.641
22720799	Hemignathus munroi	EN	Bird	7927	7210	90.955	2780	35.07
22719149	Foudia rubra	EN	Bird	11	10	90.9091	9	81.8182
136586	Hipposideros scutinares	VU	Mammal	23791	21627	90.9041	7103	32.8432
55329	Gastrotheca cornuta	EN	Amphibian	88604	80538	90.8966	24161	27.2685
22691322	Ramphiculus merrilli	NT	Bird	62934	57189	90.8714	43148	68.5607
22712042	Eurochelidon sirintarae	CR	Bird	899955	817682	90.8581	511422	56.8275
55913	Ptychohyla leonhardschultzei	EN	Amphibian	1125	1022	90.8444	432	38.4
22682627	Ceratogymna elata	VU	Bird	498028	452284	90.815	178946	35.9309
59053	Ambystoma barbouri	NT	Amphibian	69162	62735	90.7073	53555	77.4341
68336601	Eupleres goudotii	VU	Mammal	83613	75842	90.706	24242	31.9638
54556	Atelopus spurrelli	VU	Amphibian	24353	22085	90.687	3485	14.3104
22694436	Saundersilarus saundersi	VU	Bird	272996	247546	90.6775	209656	76.7982
22711939	Parus holsti	NT	Bird	13055	11834	90.6473	3064	23.4699
45430583	Amazona guatemalae	NT	Bird	365050	330846	90.6303	179014	49.0382
5144	Colobus polykomos	VU	Mammal	342383	310149	90.5854	85146	27.4533
56340	Ceratophrys ornata	NT	Amphibian	546470	494842	90.5525	425234	77.8147
22691924	Ardeotis arabs	NT	Bird	2948873	2670129	90.5474	2150686	72.9325
6925	Pseudalopex sechurae	NT	Mammal	70480	63816	90.5448	30889	48.4032
56324	Atelognathus praebasalticus	EN	Amphibian	2335	2114	90.5353	586	25.0964
15311	Leopardus guigna	VU	Mammal	255330	231084	90.5041	131234	56.7906
22690351	Columba malherbii	NT	Bird	965	873	90.4663	526	54.5078
5953	Cuon alpinus	EN	Mammal	3282009	2968703	90.4538	1985746	66.8893
22695225	Gyps coprotheres	EN	Bird	3164995	2861428	90.4086	1950392	61.6239
22689038	Scotopelia ussheri	VU	Bird	360487	325903	90.4063	123832	34.3513
22685025	Psittrichas fulgidus	VU	Bird	357343	323026	90.3966	80775	22.6043
2814	Bison bonasus	VU	Mammal	5695	5148	90.3951	3798	73.7762
22685533	Cyanopsitta spixii	CR (PEW)	Bird	122839	111022	90.3801	60004	48.8477
22731517	Corvus palmarum	NT	Bird	58118	52515	90.3593	40915	70.3999
19381	Ratufa macroura	NT	Mammal	31939	28834	90.2783	22954	79.6074
45014476	Goura sclaterii	NT	Bird	210410	189912	90.2581	61577	29.2652
55141	Allobates ranoides	EN	Amphibian	2185	1972	90.2517	1963	89.8398
22682453	Buceros bicornis	NT	Bird	2957203	2668277	90.2298	1678005	56.743
22678891	Pternistis camerunensis	EN	Bird	194	175	90.2062	0	0
22695379	Circus maurus	VU	Bird	1469800	1325165	90.1595	928770	63.1902
12627	Macropus parma	NT	Mammal	47239	42552	90.0781	24927	58.5801
12561	Macaca sylvanus	EN	Mammal	41657	37511	90.0473	35311	94.1351
136640	Cacajao hosomi	VU	Mammal	1878	1691	90.0426	11	0.650503
22682494	Penelopides panini	EN	Bird	27477	24741	90.0426	22181	80.7257
14127	Myotis dasycneme	NT	Mammal	4816675	4336404	90.029	3079898	71.0242
22729460	Gyps tenuirostris	CR	Bird	1852460	1667497	90.0153	1119267	60.4206
22678382	Penelope albipennis	CR	Bird	18707	16838	90.0091	7798	41.6849
12303	Lontra felina	EN	Mammal	5697	5127	89.9947	974	18.9975
16746	Petrogale penicillata	VU	Mammal	95174	85646	89.9889	52107	60.84
3570	Callithrix aurita	VU	Mammal	160173	144090	89.959	124890	86.675
54502	Atelopus cruciger	CR	Amphibian	7001	6297	89.9443	4387	62.6625
11619	Lepilemur microdon	EN	Mammal	673	605	89.896	165	27.2727
18550	Pseudomys fumeus	VU	Mammal	14720	13230	89.8777	5500	41.5722
22727333	Pipile grayi	NT	Bird	947699	851623	89.8622	441048	46.5388
55427	Hyloscirtus callipeza	NT	Amphibian	2364	2123	89.8054	2067	87.4365
22696007	Harpyopsis novaeguineae	VU	Bird	732162	657386	89.787	214286	29.2676
136309	Rhynchocyon udzungwensis	VU	Mammal	322	289	89.7516	5	1.7301
41029	Litoria booroolongensis	CR	Amphibian	135991	121998	89.7103	85750	63.0556
2150	Arvicola sapidus	VU	Mammal	879913	789262	89.6977	657624	83.3214
136750	Moschus cupreus	EN	Mammal	125025	112139	89.6933	25980	23.1677
54354	Philoria loveridgei	EN	Amphibian	446	400	89.6861	83	18.6099
60760066	Ptilinopus chrysogaster	NT	Bird	348	312	89.6552	245	70.4023
58714	Lithobates sevosus	CR	Amphibian	21209	19010	89.6318	13910	65.5854
22682857	Harpactes wardi	NT	Bird	136179	122037	89.6151	36286	26.6458
58271	Zakerana greenii	EN	Amphibian	307	275	89.5765	249	81.1075
54505	Atelopus elegans	CR	Amphibian	9273	8306	89.5719	5225	56.3464
59049	Ambystoma altamirani	EN	Amphibian	1448	1297	89.5718	1093	75.4834
22723301	Poospiza cinerea	VU	Bird	1362736	1219055	89.4564	1033225	75.8199
54498	Atelopus chiriquiensis	CR	Amphibian	1593	1425	89.4539	629	39.4852
22678073	Rhea americana	NT	Bird	6558485	5865670	89.4364	4302140	65.5966
22687627	Eupherusa poliocerca	VU	Bird	15373	13743	89.397	3143	20.4449
520	Adelotus brevis	NT	Amphibian	479873	428403	89.2742	262683	54.7401
19819	Saguinus leucopus	EN	Mammal	57179	51046	89.274	45936	89.9894
22684360	Coccyzus rufigularis	EN	Bird	17278	15421	89.2522	13900	80.4491
45015567	Nisaetus philippensis	EN	Bird	126209	112617	89.2306	85932	68.0871
22709449	Eumyias albicaudatus	NT	Bird	32999	29444	89.2269	13344	40.4376
22046	Tragelaphus buxtoni	EN	Mammal	6919	6173	89.2181	1833	29.6938
55685	Ecnomiohyla valancifer	CR	Amphibian	1250	1115	89.2	687	54.96
12150	Litoria pearsoniana	NT	Amphibian	36488	32546	89.1964	23040	63.144
41301	Sylvilagus obscurus	NT	Mammal	94575	84352	89.1906	50252	59.5742
136791	Rungwecebus kipunji	CR	Mammal	74	66	89.1892	3	4.54545
22684236	Centropus nigrorufus	VU	Bird	27427	24460	89.1822	21910	79.8848
54544	Atelopus pulcher	CR	Amphibian	9312	8300	89.1323	1350	14.4974
22717180	Certhilauda burra	VU	Bird	72414	64491	89.0587	36002	49.7169
15046	Ochotona koslowi	EN	Mammal	1213	1080	89.0354	0	0
8668	Fossa fossana	VU	Mammal	91236	81196	88.9956	25396	31.2774
22690988	Gallicolumba keayi	CR	Bird	24328	21647	88.9798	18827	77.3882
55592	Megastomatohyla pellita	CR	Amphibian	1090	969	88.8991	623	57.156
22679012	Perdicula manipurensis	EN	Bird	138069	122702	88.8701	79492	57.5741
8206	Eulemur collaris	EN	Mammal	8192	7280	88.8672	2400	32.967
16801	Phaeognathus hubrichti	EN	Amphibian	961	854	88.8658	346	36.0042
22696207	Spizaetus isidori	EN	Bird	472116	419465	88.8479	246597	52.2323
11700	Leptopelis xenodactylus	EN	Amphibian	10608	9423	88.8292	9052	85.3318
12142	Litocranius walleri	NT	Mammal	1414148	1255879	88.8082	901899	71.8142
1099	Ambystoma cingulatum	VU	Amphibian	92242	81876	88.7622	53561	58.0657
18766	Pteropus vampyrus	NT	Mammal	1840656	1633275	88.7333	938545	57.464
22697742	Fregata andrewsi	CR	Bird	34988	31045	88.7304	20685	59.1203
22053	Tragelaphus imberbis	NT	Mammal	1477377	1310878	88.7301	914986	69.7995
3816	Capricornis thar	NT	Mammal	482301	427852	88.7106	213800	49.9706
22709182	Rhinomyias albigularis	EN	Bird	23904	21196	88.6714	18966	79.3424
8970	Gazella gazella	VU	Mammal	329508	292106	88.6491	117489	40.2214
22727445	Lophura rufa	NT	Bird	410133	363521	88.6349	176329	42.9931
54536	Atelopus pachydermus	CR	Amphibian	8989	7965	88.6083	3425	38.1021
22695849	Buteogallus solitarius	NT	Bird	1003976	889327	88.5805	425974	42.4287
3441	Cacosternum capense	NT	Amphibian	11517	10197	88.5387	9867	85.6734
22682517	Rhabdotorrhinus waldeni	CR	Bird	23371	20687	88.5157	18457	78.9739
54501	Atelopus coynei	CR	Amphibian	2977	2635	88.5119	1154	38.7639
16890	Phascogale tapoatafa	NT	Mammal	223243	197520	88.4776	133400	67.5375
2279	Ateles geoffroyi	EN	Mammal	885047	782425	88.4049	473853	60.5621
22691896	Tetrax tetrax	NT	Bird	10178396	8996224	88.3855	6744353	66.2615
56765	Craugastor milesi	CR	Amphibian	413	365	88.3777	256	61.9855
22694053	Vanellus gregarius	CR	Bird	11845058	10463588	88.3372	7869328	66.4355
56940	Craugastor sabrinus	EN	Amphibian	7056	6230	88.2937	1320	18.7075
54468	Ansonia guibei	EN	Amphibian	3613	3189	88.2646	689	19.07
136812	Dendrolagus stellarum	VU	Mammal	44008	38826	88.2249	2626	6.76351
55195	Andinobates opisthomelas	VU	Amphibian	3480	3070	88.2184	3018	86.7241
22709134	Rhinomyias brunneatus	VU	Bird	680094	599925	88.2121	298699	43.9203
55244	Mannophryne herminae	NT	Amphibian	9657	8518	88.2054	6458	66.8738
22696628	Podiceps gallardoi	CR	Bird	81344	71735	88.1872	46156	56.7417
22696186	Nisaetus nanus	VU	Bird	1095906	966313	88.1748	531933	48.5382
22678395	Penelope ochrogaster	VU	Bird	81744	72069	88.1643	46306	56.6476
22720940	Emberiza socotrana	VU	Bird	3570	3147	88.1513	2471	69.2157
12556	Macaca nigra	CR	Mammal	5723	5044	88.1356	4386	86.9548
22697444	Theristicus branickii	NT	Bird	298565	263086	88.1168	209623	70.2102
12559	Macaca silenus	EN	Mammal	28060	24722	88.1041	10822	43.7748
22680556	Turnix melanogaster	NT	Bird	5896	5194	88.0936	3401	57.6832
55872	Plectrohyla chrysopleura	CR	Amphibian	109	96	88.0734	0	0
10613	Hynobius abei	CR	Amphibian	2225	1959	88.0449	1934	86.9213
22686395	Amazona arausiaca	VU	Bird	743	654	88.0215	368	49.5289
10548	Hylobates lar	EN	Mammal	631346	555332	87.96	297182	53.5143
58718	Lithobates sierramadrensis	VU	Amphibian	11826	10400	87.9418	3590	30.3568
21212	Sylvilagus transitionalis	VU	Mammal	21008	18474	87.9379	17979	97.3206
41033	Litoria freycineti	VU	Amphibian	57476	50524	87.9045	35961	62.567
9672	Hapalemur aureus	CR	Mammal	2401	2110	87.88	520	24.6445
20759	Rattus richardsoni	VU	Mammal	7011	6160	87.8619	310	5.03247
6437	Dendrolagus mbaiso	EN	Mammal	5591	4910	87.8197	680	13.8493
10614	Hynobius dunni	EN	Amphibian	6624	5817	87.817	5321	80.3291
9618	Hadromys humei	EN	Mammal	2063	1811	87.7848	1280	70.6792
22691198	Treron capellei	VU	Bird	1128101	990052	87.7627	545642	48.3682
41239	Limnonectes namiyei	EN	Amphibian	147	129	87.7551	92	62.585
9917	Nilgiritragus hylocrius	EN	Mammal	2128	1867	87.735	597	31.9764
22724163	Nesopsar nigerrimus	EN	Bird	1741	1527	87.7082	715	41.0684
56957	Pristimantis scoloblepharus	EN	Amphibian	819	718	87.6679	718	87.6679
22679726	Chauna chavaria	NT	Bird	91776	80435	87.6427	76824	83.7082
179234	Tarsius tumpara	CR	Mammal	97	85	87.6289	83	97.6471
22735692	Rostratula australis	EN	Bird	1393416	1220910	87.6199	740510	53.1435
18583	Pseudophryne australis	VU	Amphibian	17237	15101	87.6081	8901	51.6389
44784	Rhinolophus ruwenzorii	VU	Mammal	22675	19863	87.5987	9163	46.131
18722	Pteropus dasymallus	NT	Mammal	37589	32922	87.5841	21222	64.4615
22715856	Pellorneum palustre	VU	Bird	62949	55133	87.5836	35633	56.6061
22696042	Aquila adalberti	VU	Bird	131363	115003	87.546	83023	63.2012
55313	Duellmanohyla soralia	EN	Amphibian	1026	898	87.5244	404	39.3762
22678934	Melanoperdix niger	VU	Bird	1098077	961032	87.5195	530752	48.3347
58575	Lithobates chiricahuensis	VU	Amphibian	231527	202620	87.5146	118220	51.061
54785	Incilius tutelarius	EN	Amphibian	1729	1513	87.5072	233	13.476
22692388	Gallirallus lafresnayanus	CR	Bird	2977	2605	87.5042	485	16.2916
22690979	Gallicolumba luzonica	NT	Bird	107271	93836	87.4756	72851	67.913
56841	Pristimantis penelopus	VU	Amphibian	6301	5511	87.4623	5434	86.2403
22678185	Crypturellus transfasciatus	NT	Bird	41935	36662	87.4258	21062	50.2253
22712603	Pycnonotus zeylanicus	VU	Bird	673381	588526	87.3987	279803	41.552
56610	Pristimantis galdi	NT	Amphibian	19211	16790	87.3978	8110	42.2154
12156	Litoria lorica	CR	Amphibian	1166	1019	87.3928	299	25.6432
22706218	Astrapia mayeri	NT	Bird	11084	9686	87.3872	966	8.71527
22679519	Tympanuchus pallidicinctus	VU	Bird	454552	397190	87.3805	244190	53.721
22678993	Anurophasis monorthonyx	NT	Bird	10054	8779	87.3185	469	4.66481
22685505	Psittacula alexandri	NT	Bird	2573975	2246186	87.2653	1293796	50.2645
22695174	Gypaetus barbatus	NT	Bird	8460948	7382178	87.25	5199334	61.451
22719703	Erythrura viridifacies	VU	Bird	105044	91617	87.2177	71232	67.8116
22727431	Lophura ignita	NT	Bird	487751	424953	87.125	142083	29.1302
22689826	Eleothreptus candicans	EN	Bird	1406029	1224652	87.1001	972782	69.1865
11034	Kobus megaceros	EN	Mammal	111105	96772	87.0996	77521	80.1068
58427	Quasipaa jiulongensis	VU	Amphibian	39351	34259	87.06	13859	35.2189
54533	Atelopus nepiozomus	CR	Amphibian	2266	1970	86.9373	220	9.70874
22691928	Ardeotis kori	NT	Bird	3582538	3112796	86.888	1918400	53.5486
22716358	Turdoides longirostris	VU	Bird	20611	17902	86.8565	14862	72.1071
22732155	Amytornis merrotsyi	NT	Bird	43255	37562	86.8385	13129	30.3526
22727395	Arborophila charltonii	VU	Bird	112050	97283	86.8211	47301	42.2142
55496	Dendropsophus gryllatus	EN	Amphibian	220	191	86.8182	191	86.8182
56785	Strabomantis necerus	VU	Amphibian	5941	5156	86.7867	2096	35.2803
16121	Paraleptomys rufilatus	EN	Mammal	2191	1901	86.764	151	7.94319
59281	Gyrinophilus palleucus	VU	Amphibian	16916	14668	86.7108	11888	70.2767
57995	Scaphiophryne boribory	EN	Amphibian	367	318	86.6485	285	77.6567
22685016	Tanygnathus gramineus	VU	Bird	1797	1557	86.6444	621	34.5576
19516	Rhinolophus euryale	NT	Mammal	2875564	2491203	86.6335	2019477	81.0643
22708339	Geomalia heinrichi	NT	Bird	8796	7620	86.6303	1100	12.5057
22720774	Hemignathus parvus	VU	Bird	1390	1204	86.6187	507	36.4748
22733677	Zoothera interpres	NT	Bird	675633	585014	86.5875	273174	40.4323
22723039	Coryphaspiza melanotis	VU	Bird	1986698	1720232	86.5875	1387642	69.8467
22693570	Pluvianellus socialis	NT	Bird	194913	168715	86.5591	107102	54.9486
22685952	Forpus xanthops	VU	Bird	2900	2509	86.5172	1129	38.931
22723403	Sporophila falcirostris	VU	Bird	43950	38002	86.4664	21502	48.9238
59350	Plethodon petraeus	VU	Amphibian	332	287	86.4458	212	63.8554
22685710	Aratinga auricapillus	NT	Bird	1273404	1100664	86.4348	977036	76.7263
39759	Nycticebus coucang	VU	Mammal	618555	534480	86.4078	330618	61.8579
21873	Thylogale calabyi	EN	Mammal	1007	870	86.3952	51	5.86207
22715592	Garrulax rufifrons	EN	Bird	4804	4148	86.3447	1378	28.6844
136128	Ambystoma bishopi	VU	Amphibian	27914	24088	86.2936	14258	51.0783
59466	Salamandra infraimmaculata	NT	Amphibian	80496	69454	86.2825	53154	66.0331
22702514	Asthenes luizae	NT	Bird	13195	11382	86.2599	3062	23.2058
55049	Hyloxalus awa	VU	Amphibian	13615	11741	86.2358	6840	50.2387
22706104	Macgregoria pulchra	VU	Bird	14254	12282	86.1653	482	3.38151
55540	Hyloscirtus lindae	VU	Amphibian	5389	4639	86.0828	1644	30.5066
22678286	Taoniscus nanus	VU	Bird	1077534	927473	86.0737	790490	73.361
22685860	Pyrrhura albipectus	VU	Bird	7932	6821	85.9934	1690	21.3061
4257	Rucervus duvaucelii	VU	Mammal	34744	29871	85.9746	27981	93.6728
22690152	Columba pollenii	NT	Bird	1939	1667	85.9722	1214	62.6096
136253	Cebus flavius	CR	Mammal	39052	33563	85.9444	25813	76.9091
22682464	Rhinoplax vigil	CR	Bird	1186284	1018447	85.8519	491447	41.4274
57328	Telmatobius brevirostris	EN	Amphibian	2110	1811	85.8294	1266	60
22679325	Syrmaticus ellioti	NT	Bird	472159	405232	85.8253	190232	40.2898
18359	Propithecus edwardsi	EN	Mammal	3094	2655	85.8112	775	29.1902
22685521	Anodorhynchus leari	EN	Bird	5260	4511	85.7605	1706	32.4335
22694286	Larus atlanticus	NT	Bird	140254	120229	85.7223	89613	63.8934
54355	Philoria sphagnicolus	EN	Amphibian	9609	8237	85.7217	4727	49.1935
22684727	Zanda baudinii	EN	Bird	61115	52381	85.7089	34013	55.6541
17830	Podomys floridanus	VU	Mammal	68188	58435	85.6969	49843	85.2965
59397	Pseudoeurycea smithi	CR	Amphibian	244	209	85.6557	78	31.9672
22708169	Cinclus schulzi	VU	Bird	31822	27251	85.6357	14781	46.449
22727599	Psittinus cyanurus	NT	Bird	1399970	1198574	85.6143	624444	44.6041
158545	Atelopus oxapampae	EN	Amphibian	222	190	85.5856	104	46.8468
12145	Litoria castanea	CR	Amphibian	8530	7296	85.5334	5305	62.1923
22678246	Nothoprocta taczanowskii	VU	Bird	26754	22857	85.434	21237	79.3788
62155060	Rallus elegans	NT	Bird	3170727	2706877	85.3709	2018431	63.6583
13217	Mesocapromys nanus	CR	Mammal	1535	1310	85.342	170	12.9771
56886	Pristimantis pugnax	VU	Amphibian	4839	4129	85.3275	1702	35.1726
22679172	Tragopan caboti	VU	Bird	398071	339582	85.3069	153582	38.5816
22715577	Schoenicola platyurus	VU	Bird	19867	16946	85.2972	6346	31.9424
17003	Phloeomys cumingi	VU	Mammal	18731	15977	85.2971	13096	81.9678
54757	Rhinella sclerocephala	EN	Amphibian	431	367	85.1508	227	52.6682
22685185	Eunymphicus cornutus	VU	Bird	3609	3073	85.1482	643	17.8166
22691341	Ramphiculus jambu	NT	Bird	1434507	1220892	85.1088	640642	44.6594
22720734	Psittirostra psittacea	CR (PE)	Bird	16055	13660	85.0825	5700	35.503
22710177	Saxicola dacotiae	NT	Bird	1386	1176	84.8485	913	65.873
22678318	Ortalis erythroptera	VU	Bird	53418	45287	84.7785	34993	65.5079
14018	Mustela lutreola	CR	Mammal	339416	287686	84.7591	157659	54.8025
55261	Phyllobates aurotaenia	NT	Amphibian	10564	8943	84.6554	1383	13.0916
19327	Rattus elaphinus	NT	Mammal	3954	3347	84.6485	1733	51.7777
12548	Macaca arctoides	VU	Mammal	1415713	1197935	84.6171	599700	50.0611
22727411	Lophura erythrophthalma	VU	Bird	482990	408654	84.6092	268400	55.5705
22736523	Pitta irena	NT	Bird	577491	488508	84.5914	311792	53.9908
22724229	Sturnella defilippii	VU	Bird	429825	363386	84.5428	302206	70.3091
41046	Heleioporus australiacus	VU	Amphibian	81626	68962	84.4853	36580	44.8142
22691874	Goura victoria	NT	Bird	116560	98452	84.4647	38147	32.7274
45092100	Crax fasciolata	VU	Bird	3420894	2887952	84.421	1984772	58.0191
16751	Petrogale lateralis	VU	Mammal	39497	33335	84.3988	1325	3.9748
15733	Ovis ammon	NT	Mammal	2593365	2186699	84.319	1304699	59.6652
8973	Eudorcas rufifrons	VU	Mammal	2258858	1904182	84.2984	1514952	79.5592
22712646	Pycnonotus taivanus	VU	Bird	7252	6112	84.2802	3292	45.3944
61898	Bolitoglossa magnifica	EN	Amphibian	76	64	84.2105	64	84.2105
20457	Speleomantes imperialis	NT	Amphibian	2392	2014	84.1973	1561	65.2592
22678220	Crypturellus atrocapillus	NT	Bird	121338	102149	84.1855	38183	31.4683
22700300	Alectrurus tricolor	VU	Bird	1001770	843321	84.1831	711201	70.9944
39895	Nomascus leucogenys	CR	Mammal	51633	43448	84.1477	16748	38.5472
55260	Aromobates serranus	EN	Amphibian	113	95	84.0708	95	84.0708
22679503	Centrocercus urophasianus	NT	Bird	1316400	1106562	84.0597	357231	27.137
57522	Gephyromantis silvanus	VU	Amphibian	3035	2550	84.0198	1120	36.9028
22686259	Amazona viridigenalis	EN	Bird	68073	57146	83.9481	45077	66.2186
22824	Ursus thibetanus	VU	Mammal	3207936	2692891	83.9447	1394623	51.7891
22716795	Paradoxornis flavirostris	VU	Bird	36616	30736	83.9414	22406	61.1918
22695180	Neophron percnopterus	EN	Bird	21146041	17742951	83.9067	12428482	58.7745
22690122	Columba junoniae	NT	Bird	1216	1020	83.8816	913	75.0822
22727636	Amazona bodini	NT	Bird	124341	104256	83.8468	31083	24.9982
22695231	Aegypius monachus	NT	Bird	11783967	9880184	83.8443	6493723	55.1064
4201	Cercocebus torquatus	VU	Mammal	283410	237487	83.7963	114012	48.0077
56355	Crossodactylus schmidti	NT	Amphibian	34135	28600	83.785	12800	37.4982
54597	Rhaebo caeruleostictus	EN	Amphibian	17837	14944	83.7809	11994	67.2422
58329	Limnonectes blythii	NT	Amphibian	452528	379125	83.7793	182216	40.2662
12549	Macaca assamensis	NT	Mammal	1790009	1499377	83.7637	788084	52.5608
55461	Hypsiboas cymbalum	CR	Amphibian	209	175	83.7321	175	83.7321
22709415	Ficedula nigrorufa	NT	Bird	21491	17966	83.5978	6666	31.0176
54773	Incilius tacanensis	EN	Amphibian	902	754	83.592	540	59.867
57365	Telmatobius truebae	EN	Amphibian	1802	1505	83.5183	558	30.9656
22700052	Xolmis dominicanus	VU	Bird	288688	241068	83.5047	218505	75.689
56442	Craugastor aurilegulus	EN	Amphibian	1693	1412	83.4022	82	4.84347
22736414	Turdus xanthorhynchus	CR	Bird	132	110	83.3333	86	65.1515
22696846	Phalacrocorax carunculatus	VU	Bird	42	35	83.3333	34	80.9524
22725006	Argusianus argus	NT	Bird	1482359	1234953	83.31	647533	43.6826
22680488	Mergus squamatus	EN	Bird	3224574	2683074	83.2071	1815380	56.2983
3814	Capricornis milneedwardsii	NT	Mammal	2925482	2433622	83.187	1430777	58.7921
55455	Hyloscirtus colymba	NT	Amphibian	16517	13735	83.1567	1535	9.29346
22679185	Lophophorus sclateri	VU	Bird	173329	144055	83.1107	38471	22.1954
58792	Feihyla palpebralis	NT	Amphibian	17003	14119	83.0383	6089	35.8113
12767	Phataginus tricuspis	VU	Mammal	5784273	4802782	83.0317	1759228	36.6294
56530	Pristimantis crenunguis	EN	Amphibian	4822	4001	82.9739	2121	43.9859
59479	Triturus pygmaeus	NT	Amphibian	173792	144170	82.9555	108070	62.1835
55312	Duellmanohyla schmidtorum	VU	Amphibian	13961	11573	82.8952	4303	30.8216
54933	Centrolene pipilatum	EN	Amphibian	146	121	82.8767	23	15.7534
22684693	Charmosyna amabilis	CR	Bird	13606	11275	82.8679	8475	62.2887
29622	Mazama pandora	VU	Mammal	144745	119846	82.798	39466	32.9306
22682450	Buceros rhinoceros	NT	Bird	1458298	1205955	82.6961	625425	42.8873
22682824	Apalharpactes reinwardtii	VU	Bird	6020	4968	82.5249	2058	34.186
136668	Dendrolagus mayri	CR	Mammal	80	66	82.5	0	0
16889	Phascogale pirata	VU	Mammal	9984	8232	82.4519	512	6.21963
136246	Pteropus yapensis	VU	Mammal	91	75	82.4176	75	100
55232	Ameerega pongoensis	VU	Amphibian	10119	8320	82.2216	1499	14.8137
22693150	Limosa limosa	NT	Bird	55426463	45565127	82.2083	30819917	55.6051
56946	Craugastor sandersoni	EN	Amphibian	5683	4670	82.1749	1060	18.6521
41039	Cophixalus mcdonaldi	EN	Amphibian	342	281	82.1637	110	32.1637
22678114	Casuarius unappendiculatus	VU	Bird	184930	151936	82.1587	56040	30.3034
17481	Platacanthomys lasiurus	VU	Mammal	28323	23257	82.1135	11057	47.5427
20165	Setonix brachyurus	VU	Mammal	16773	13772	82.1081	7823	56.8037
12419	Lutra lutra	NT	Mammal	21143390	17355776	82.0861	10694656	61.6202
22718611	Anthus nattereri	VU	Bird	714060	585797	82.0375	494576	69.2625
22720036	Fringilla teydea	NT	Bird	445	365	82.0225	269	60.4494
55266	Alytes cisternasii	NT	Amphibian	170459	139740	81.9787	99640	58.4539
39775	Nomascus concolor	CR	Mammal	26400	21627	81.9205	9327	43.1266
135806	Pelophylax caralitanus	NT	Amphibian	15446	12648	81.8853	7640	49.4626
22695254	Sarcogyps calvus	CR	Bird	4362144	3561999	81.6571	2662200	61.0296
22719618	Amandava formosa	VU	Bird	460704	376115	81.6392	361314	78.4265
22698471	Nesofregetta fuliginosa	EN	Bird	2606	2127	81.6193	903	34.6508
18743	Pteropus niger	VU	Mammal	1848	1508	81.6017	1353	89.7215
20638	Spilocuscus papuensis	VU	Mammal	2678	2185	81.5907	584	26.7277
22723509	Sporophila melanogaster	NT	Bird	872760	711718	81.548	636930	72.9788
22721873	Leucopeza semperi	CR	Bird	81	66	81.4815	36	44.4444
22700393	Myiarchus semirufus	EN	Bird	45968	37416	81.3958	16149	35.131
62293391	Psittacara wagleri	NT	Bird	203859	165814	81.3376	139014	68.1912
22685516	Anodorhynchus hyacinthinus	VU	Bird	2844840	2313683	81.3291	1327527	46.6644
18504	Pseudochirops corinnae	NT	Mammal	184662	150150	81.3107	13102	8.72594
14294	Naemorhedus baileyi	VU	Mammal	232468	188979	81.2925	82937	43.8869
22697702	Ephippiorhynchus asiaticus	NT	Bird	5908034	4800411	81.2523	3002315	50.8175
22686342	Amazona auropalliata	VU	Bird	128262	104156	81.2057	82606	64.4041
12152	Litoria raniformis	EN	Amphibian	441003	357958	81.1691	280716	63.654
20458	Speleomantes italicus	NT	Amphibian	17687	14346	81.1104	11936	67.4846
22696495	Falco cherrug	EN	Bird	33873158	27464289	81.0798	17673759	52.1763
2993	Brachyteles arachnoides	EN	Mammal	86495	70128	81.0775	45028	64.2083
22685434	Psittacula eupatria	NT	Bird	3231470	2619430	81.06	1921012	59.447
22695763	Buteogallus lacernulatus	VU	Bird	164532	133300	81.0177	101600	61.7509
41763	Equus ferus	EN	Mammal	25769	20870	80.9888	13173	63.1193
22682044	Pteroglossus bailloni	NT	Bird	659877	534209	80.9558	440965	66.8253
14126	Myotis capaccinii	VU	Mammal	1223703	989563	80.8663	795510	80.39
56614	Pristimantis ginesi	EN	Amphibian	752	608	80.8511	608	80.8511
22678145	Tinamus osgoodi	VU	Bird	28880	23341	80.8206	4842	16.7659
6234	Beatragus hunteri	CR	Mammal	10652	8605	80.783	3235	37.5944
13595	Mixophyes balbus	VU	Amphibian	109766	88664	80.7755	46054	41.9565
41045	Crinia tinnula	VU	Amphibian	29100	23496	80.7423	17856	61.3608
6302	Daubentonia madagascariensis	EN	Mammal	125381	101168	80.6885	39168	38.7158
57334	Telmatobius culeus	CR	Amphibian	9240	7453	80.6602	5566	60.2381
6427	Dendrolagus dorianus	VU	Mammal	40092	32334	80.6495	834	2.57933
56938	Eleutherodactylus ruthae	EN	Amphibian	4021	3242	80.6267	2636	65.5558
22679330	Syrmaticus humiae	NT	Bird	407363	328327	80.5981	203297	49.9056
18134	Presbytis siamensis	NT	Mammal	153442	123569	80.5314	56204	45.4839
22698684	Pitta nympha	VU	Bird	1378725	1110286	80.5299	684556	49.6514
55518	Hyloscirtus jahni	NT	Amphibian	1188	956	80.4714	894	75.2525
22684630	Vini kuhlii	EN	Bird	143	115	80.4196	112	78.3217
22697695	Ciconia boyciana	EN	Bird	2650986	2130332	80.36	1484243	55.9883
22689809	Antrostomus noctitherus	EN	Bird	285	229	80.3509	229	80.3509
6802	Dorcopsulus vanheurni	NT	Mammal	178690	143524	80.3201	11524	8.02932
22692486	Rallus antarcticus	VU	Bird	702188	563833	80.2966	268173	38.1911
22691749	Ducula bakeri	VU	Bird	4064	3262	80.2657	1616	39.7638
8703	Funambulus sublineatus	VU	Mammal	28625	22969	80.241	9869	42.9666
56460	Pristimantis bicolor	VU	Amphibian	6264	5023	80.1884	4998	79.7893
22678497	Pauxi pauxi	EN	Bird	113771	91190	80.1522	74190	65.2099
22720827	Paroreomyza maculata	CR (PE)	Bird	1491	1195	80.1476	935	62.7096
22683347	Todiramphus farquhari	NT	Bird	5565	4456	80.0719	3026	54.3756
19751	Rousettus spinalatus	VU	Mammal	71542	57254	80.0285	16605	29.0023
46086107	Melanophryniscus peritus	CR	Amphibian	10	8	80	5	50
22720855	Palmeria dolei	CR	Bird	1057	845	79.9432	299	28.2876
14295	Naemorhedus caudatus	VU	Mammal	170068	135846	79.8775	48591	35.7692
19177	Rana muscosa	EN	Amphibian	16146	12892	79.8464	4217	26.1179
22720756	Hemignathus kauaiensis	VU	Bird	1346	1074	79.792	377	28.0089
59383	Pseudoeurycea leprosa	VU	Amphibian	12068	9624	79.7481	6684	55.3861
22736432	Chasiempis sclateri	VU	Bird	1343	1071	79.7468	378	28.1459
22684559	Trichoglossus johnstoniae	NT	Bird	8742	6964	79.6614	534	6.10844
57336	Telmatobius degener	EN	Amphibian	157	125	79.6178	87	55.414
13120	Melomys fraterculus	CR	Mammal	132	105	79.5455	0	0
22697896	Pseudobulweria aterrima	CR	Bird	44	35	79.5455	35	79.5455
22728472	Centrocercus minimus	EN	Bird	9692	7708	79.5295	3535	36.4734
10617	Hynobius stejnegeri	VU	Amphibian	5951	4728	79.4488	3853	64.7454
18563	Mastacomys fuscus	NT	Mammal	47538	37760	79.4312	14000	37.0763
12149	Litoria nyakalensis	CR	Amphibian	11574	9192	79.4194	3181	27.484
22720809	Oreomystis bairdi	CR	Bird	1319	1047	79.3783	355	26.9143
22720836	Loxops coccineus	EN	Bird	10617	8422	79.3256	3222	30.3476
55307	Duellmanohyla chamulae	EN	Amphibian	474	376	79.3249	180	37.9747
135825	Speleomantes sarrabusensis	VU	Amphibian	29	23	79.3103	7	24.1379
56813	Eleutherodactylus orcutti	CR	Amphibian	285	226	79.2982	86	30.1754
22695194	Gyps bengalensis	CR	Bird	5714706	4530885	79.2847	3203416	56.0557
22690895	Leptotila ochraceiventris	VU	Bird	46375	36761	79.269	26138	56.3623
5560	Crocidura canariensis	EN	Mammal	2430	1926	79.2593	1531	79.4912
22706910	Rhipidura malaitae	VU	Bird	626	496	79.2332	4	0.638978
22722985	Dacnis nigripes	NT	Bird	51359	40685	79.2169	27984	54.487
22698092	Pterodroma hasitata	EN	Bird	10395	8229	79.1631	6651	63.9827
22727255	Ciconia episcopus	VU	Bird	3862541	3057637	79.1613	2417618	62.5914
22719011	Ploceus megarhynchus	VU	Bird	67194	53190	79.1589	44694	66.5149
22696516	Falco deiroleucus	NT	Bird	3339417	2643406	79.1577	1210369	36.2449
3036	Bradypus torquatus	VU	Mammal	75780	59974	79.1423	44074	73.4885
54543	Atelopus planispina	CR	Amphibian	3278	2594	79.1336	1529	46.6443
22685966	Brotogeris pyrrhoptera	EN	Bird	12496	9869	78.9773	6259	50.088
22736369	Icterus northropi	CR	Bird	5052	3986	78.8994	686	13.5788
41038	Litoria subglandulosa	VU	Amphibian	16507	12989	78.6878	7310	44.2842
22678537	Crax globulosa	EN	Bird	59506	46753	78.5685	15382	25.8495
22716844	Paradoxornis heudei	NT	Bird	447940	351844	78.5471	227408	50.7675
22686419	Triclaria malachitacea	NT	Bird	49180	38608	78.5035	24408	49.6299
12144	Litoria brevipalmata	EN	Amphibian	71628	56216	78.4833	37567	52.4474
21583	Telmatobius pefauri	CR	Amphibian	102	80	78.4314	0	0
21585	Telmatobius zapahuirensis	EN	Amphibian	102	80	78.4314	0	0
57166	Leptodactylus silvanimbus	CR	Amphibian	139	109	78.4173	103	74.1007
41653	Mustela altaica	NT	Mammal	4800382	3760684	78.3413	1901904	50.5734
55107	Epipedobates machalilla	NT	Amphibian	28921	22620	78.2131	19170	66.284
22707593	Laniarius mufumbiri	NT	Bird	98826	77294	78.2122	50751	51.3539
22731728	Progne murphyi	VU	Bird	134574	105248	78.2083	38218	28.3992
8972	Gazella leptoceros	EN	Mammal	720379	563000	78.1533	60900	10.8171
56791	Pristimantis nigrogriseus	VU	Amphibian	9663	7549	78.1227	4261	44.096
22721129	Ammodramus caudacutus	VU	Bird	152102	118813	78.114	90684	59.6205
14258	Mysateles prehensilis	NT	Mammal	105719	82555	78.0891	55654	67.4145
12776	Mantella aurantiaca	CR	Amphibian	543	424	78.0847	226	41.6206
22679157	Tragopan satyra	NT	Bird	99563	77729	78.0702	27669	27.7904
22715412	Phylloscopus amoenus	VU	Bird	41	32	78.0488	0	0
22711228	Sitta magna	EN	Bird	433358	338210	78.044	205188	47.3484
12154	Litoria spenceri	CR	Amphibian	16620	12970	78.0385	5580	33.574
22679529	Meleagris ocellata	NT	Bird	164423	128248	77.9988	41670	25.3432
54969	Nymphargus megacheirus	EN	Amphibian	676	527	77.9586	204	30.1775
55876	Plectrohyla guatemalensis	CR	Amphibian	55398	43169	77.9252	22669	40.9202
7149	Eleutherodactylus cooki	VU	Amphibian	172	134	77.907	134	77.907
58702	Lithobates pueblae	CR	Amphibian	9	7	77.7778	0	0
11792	Lepus callotis	NT	Mammal	424256	329539	77.6746	214705	65.1531
55159	Hyloxalus toachi	EN	Amphibian	4315	3351	77.6593	674	15.6199
55095	Hyloxalus infraguttatus	NT	Amphibian	37450	29060	77.5968	23720	63.3378
54870	Pelophryne misera	VU	Amphibian	4499	3488	77.5283	528	11.7359
22724268	Hypopyrrhus pyrohypogaster	VU	Bird	31877	24672	77.3975	23522	73.7899
55418	Hyloscirtus bogotensis	NT	Amphibian	16318	12621	77.344	12464	76.3819
55249	Mannophryne olmonae	VU	Amphibian	150	116	77.3333	85	56.6667
56929	Pristimantis ruedai	VU	Amphibian	2627	2031	77.3125	591	22.4971
56721	Craugastor lineatus	CR	Amphibian	15893	12278	77.2541	4148	26.0995
22693049	Pedionomus torquatus	EN	Bird	32732	25286	77.2516	8778	26.8178
22736423	Chasiempis ibidis	EN	Bird	1491	1151	77.1965	891	59.7586
19549	Rhinolophus maclaudi	EN	Mammal	8245	6359	77.1255	2959	46.5325
1093	Ambystoma lermaense	EN	Amphibian	83	64	77.1084	64	77.1084
22679241	Lophura swinhoii	NT	Bird	15354	11838	77.1004	3388	22.0659
56584	Pristimantis eriphus	VU	Amphibian	2798	2157	77.0908	566	20.2287
22692167	Grus japonensis	EN	Bird	2227239	1716133	77.052	1191672	53.5045
12153	Litoria rheocola	EN	Amphibian	15121	11650	77.0452	3645	24.1055
18231	Procapra picticaudata	NT	Mammal	1547095	1189325	76.8747	674025	56.6729
22734897	Polyplectron katsumatae	EN	Bird	2174	1669	76.7709	696	32.0147
57618	Scutiger ningshanensis	EN	Amphibian	6974	5353	76.7565	2503	35.8905
20454	Speleomantes ambrosii	NT	Amphibian	912	700	76.7544	612	67.1053
21529	Taudactylus acutirostris	CR	Amphibian	14527	11148	76.7399	3418	23.5286
17602	Plecotus teneriffae	VU	Mammal	3148	2414	76.6836	2006	83.0986
19484	Rheomys mexicanus	EN	Mammal	90	69	76.6667	0	0
22719890	Lonchura stygia	NT	Bird	18705	14331	76.6159	1314	7.02486
22684647	Vini ultramarina	EN	Bird	325	249	76.6154	0	0
45359046	Malacoptila striata	NT	Bird	732124	560443	76.5503	489416	66.8488
57063	Craugastor yucatanensis	NT	Amphibian	24277	18582	76.5416	7867	32.4052
12151	Litoria piperata	CR	Amphibian	5043	3858	76.5021	2223	44.0809
22721297	Torreornis inexpectata	EN	Bird	4125	3155	76.4848	285	6.90909
22706921	Rhipidura semirubra	VU	Bird	1916	1464	76.4092	464	24.2171
22722890	Tangara peruviana	VU	Bird	100363	76675	76.3977	41574	41.4236
55915	Ptychohyla panchoi	EN	Amphibian	220	168	76.3636	11	5
57583	Megophrys stejnegeri	VU	Amphibian	12131	9260	76.3334	3610	29.7585
22723399	Sporophila frontalis	VU	Bird	175897	134074	76.223	92228	52.433
41037	Litoria olongburensis	VU	Amphibian	7829	5959	76.1144	3869	49.4188
21494	Tarsius pelengensis	EN	Mammal	2269	1725	76.0247	1522	88.2319
22694299	Larus leucophthalmus	NT	Bird	1459	1108	75.9424	953	65.3187
58354	Limnonectes malesianus	NT	Amphibian	140897	106761	75.7724	52592	37.3266
8207	Eulemur fulvus	NT	Mammal	48218	36519	75.7373	14619	40.0312
57337	Telmatobius edaphonastes	EN	Amphibian	1158	877	75.734	25	2.15889
22696668	Morus capensis	VU	Bird	5741	4344	75.6663	3699	64.4313
22686246	Amazona tucumana	VU	Bird	69505	52562	75.6233	25862	37.2088
58588	Lithobates dunni	EN	Amphibian	1410	1066	75.6028	465	32.9787
19596	Rhinopithecus roxellana	EN	Mammal	311120	235102	75.5663	151402	64.3984
6506	Desmana moschata	VU	Mammal	1206055	911092	75.5432	742578	81.5042
22682585	Bycanistes cylindricus	VU	Bird	480060	362525	75.5166	136435	28.4204
22700862	Lipaugus lanioides	NT	Bird	245107	184988	75.4723	135788	55.3995
11450	Leiopelma archeyi	CR	Amphibian	756	570	75.3968	217	28.7037
59382	Pseudoeurycea juarezi	CR	Amphibian	134	101	75.3731	0	0
22732059	Gallirallus calayanensis	VU	Bird	69	52	75.3623	0	0
22694834	Larosterna inca	NT	Bird	874	658	75.286	561	64.1876
22698001	Pterodroma alba	EN	Bird	2263	1701	75.1657	480	21.2108
11616	Lepilemur dorsalis	VU	Mammal	9564	7182	75.0941	2242	31.2169
20476	Spermophilus townsendii	VU	Mammal	10593	7954	75.0873	6568	82.5748
22731595	Amazona diadema	EN	Bird	63839	47931	75.0811	6252	9.79339
56583	Pristimantis eremitus	VU	Amphibian	1641	1232	75.0762	258	15.7221
10863	Isoodon auratus	VU	Mammal	3077	2309	75.0406	290	12.5595
55851	Phyllomedusa ecuatoriana	EN	Amphibian	8	6	75	6	75
12761	Manis crassicaudata	EN	Mammal	3238501	2428835	74.9987	2007818	82.6659
4651	Chinchilla chinchilla	EN	Mammal	263962	197961	74.996	45682	23.0763
41637	Spilogale pygmaea	VU	Mammal	94704	70915	74.8807	29515	41.6202
22721578	Gubernatrix cristata	EN	Bird	1307620	978601	74.8383	650459	49.7437
22692064	Antigone antigone	VU	Bird	1889870	1413944	74.817	1248087	66.0409
22690819	Claravis geoffroyi	CR	Bird	250363	187062	74.7163	136818	54.6479
55873	Plectrohyla dasypus	CR	Amphibian	264	197	74.6212	62	23.4848
22692024	Sypheotides indicus	EN	Bird	2485057	1853138	74.5712	1621239	65.2395
22678139	Tinamus solitarius	NT	Bird	1074194	800216	74.4946	656760	61.1398
16572	Perameles gunnii	VU	Mammal	29859	22236	74.47	13269	59.6735
7147	Eleutherodactylus semipalmatus	CR	Amphibian	1095	814	74.3379	537	49.0411
12562	Macaca thibetana	NT	Mammal	1331795	989388	74.2898	662136	66.9238
8998	Genetta cristata	VU	Mammal	101241	75166	74.2446	38566	51.3078
22706202	Cicinnurus respublica	NT	Bird	3660	2716	74.2077	863	23.5792
854	Allactaga euphratica	NT	Mammal	734376	544707	74.1728	204594	37.5604
41032	Litoria cooloolensis	EN	Amphibian	2225	1650	74.1573	756	33.9775
22720368	Carduelis yarrellii	VU	Bird	490620	363306	74.0504	203708	41.5205
22728464	Scytalopus iraiensis	EN	Bird	1139	843	74.0123	567	49.7805
55555	Dendropsophus meridensis	EN	Amphibian	751	555	73.9015	555	73.9015
22706241	Paradisaea rubra	NT	Bird	3601	2661	73.8961	850	23.6046
22698280	Pelecanoides garnotii	EN	Bird	879	649	73.8339	530	60.2958
22686374	Amazona vinacea	EN	Bird	536390	395803	73.7902	293332	54.6863
22732350	Garrulax courtoisi	CR	Bird	324	239	73.7654	120	37.037
18751	Pteropus poliocephalus	VU	Mammal	236869	174725	73.7644	104750	59.9514
22685219	Lathamus discolor	CR	Bird	767035	565724	73.7547	395781	51.5988
22696492	Falco jugger	NT	Bird	2561668	1887615	73.6869	1544904	60.3085
22704507	Dasyornis brachypterus	EN	Bird	30134	22192	73.6444	12881	42.7457
55880	Plectrohyla matudai	VU	Amphibian	5903	4347	73.6405	1857	31.4586
22691030	Alopecoenas erythropterus	CR	Bird	1320	972	73.6364	359	27.197
9918	Arabitragus jayakari	EN	Mammal	31583	23255	73.6314	5355	23.0273
17315	Pipistrellus maderensis	VU	Mammal	3852	2835	73.5981	2326	82.0459
22728160	Coccyzus bahamensis	NT	Bird	5660	4165	73.5866	865	15.2827
57625	Leptobrachium boringii	EN	Amphibian	15379	11287	73.3923	8497	55.2507
22731577	Rallus obsoletus	NT	Bird	55692	40834	73.3211	26928	48.3516
22679278	Lophura bulweri	VU	Bird	276396	202591	73.2974	49371	17.8624
58439	Quasipaa spinosa	VU	Amphibian	1160257	850428	73.2965	486206	41.905
56065	Afrixalus knysnae	EN	Amphibian	1753	1284	73.2459	1154	65.83
16689	Peromyscus simulus	VU	Mammal	16102	11792	73.2331	5292	44.8779
56834	Eleutherodactylus patriciae	EN	Amphibian	1631	1193	73.1453	217	13.3047
11793	Lepus hainanus	VU	Mammal	31702	23188	73.1437	16908	72.917
22684661	Charmosyna palmarum	VU	Bird	12313	9006	73.1422	5390	43.7749
58424	Quasipaa exilispinosa	VU	Amphibian	94219	68905	73.1328	25505	27.0699
22678646	Leipoa ocellata	VU	Bird	629306	459987	73.0943	229240	36.4274
61917	Lyciasalamandra flavimembris	EN	Amphibian	353	258	73.0878	127	35.9773
54657	Peltophryne gundlachi	VU	Amphibian	57727	42188	73.0819	28188	48.8298
12148	Litoria nannotis	EN	Amphibian	18907	13814	73.0629	4260	22.5313
22724477	Stymphalornis acutirostris	EN	Bird	742	542	73.0458	355	47.8437
55442	Plectrohyla charadricola	EN	Amphibian	1335	975	73.0337	590	44.1948
193431	Ranitomeya benedicta	VU	Amphibian	8360	6105	73.0263	896	10.7177
11307	Lariscus obscurus	NT	Mammal	5574	4070	73.0176	2010	49.3857
22718591	Anthus spragueii	VU	Bird	4049376	2955860	72.9954	1748960	43.1909
20637	Spilocuscus kraemeri	NT	Mammal	1844	1346	72.9935	347	25.7801
61914	Lyciasalamandra atifi	EN	Amphibian	1755	1279	72.8775	624	35.5556
58340	Limnonectes ibanorum	NT	Amphibian	120301	87654	72.8622	11328	9.41638
56524	Strabomantis cornutus	VU	Amphibian	16822	12253	72.8391	4900	29.1285
22697817	Spheniscus humboldti	VU	Bird	3372	2455	72.8055	2149	63.7307
5620	Crocidura allex	VU	Mammal	6702	4869	72.65	3039	62.4153
22715559	Chaetornis striata	VU	Bird	1121748	814940	72.6491	723151	64.4664
56985	Pristimantis supernatis	VU	Amphibian	8299	6029	72.6473	3439	41.4387
59083	Batrachuperus karlschmidti	VU	Amphibian	2980	2160	72.4832	1783	59.8322
977	Alytes muletensis	VU	Amphibian	225	163	72.4444	147	65.3333
41586	Pseudalopex fulvipes	EN	Mammal	8669	6280	72.442	1070	17.0382
22699951	Tumbezia salvini	NT	Bird	29098	21074	72.4242	7404	25.445
20757	Nesoromys ceramicus	EN	Mammal	446	323	72.4215	35	10.8359
55882	Plectrohyla psiloderma	EN	Amphibian	315	228	72.381	64	20.3175
16727	Petaurus gracilis	EN	Mammal	3306	2392	72.3533	1042	43.5619
56529	Pristimantis cremnobates	EN	Amphibian	83	60	72.2892	22	26.506
14969	Litoria dayi	EN	Amphibian	18769	13567	72.2841	4161	22.1695
56662	Pristimantis ignicolor	EN	Amphibian	151	109	72.1854	60	39.7351
61906	Pseudoeurycea boneti	VU	Amphibian	4123	2976	72.1805	1166	28.2804
22698240	Puffinus newelli	EN	Bird	1232	889	72.1591	367	29.789
19156	Rana latastei	VU	Amphibian	33714	24324	72.1481	23587	69.962
59485	Tylototriton shanjing	NT	Amphibian	196354	141210	71.916	89810	45.7388
22678559	Aepypodius bruijnii	EN	Bird	843	606	71.8861	6	0.711744
22700968	Procnias nudicollis	VU	Bird	1472832	1057990	71.8337	869624	59.0443
22693170	Numenius borealis	CR (PE)	Bird	2203295	1581277	71.7687	1189327	53.9795
6985	Callistomys pictus	EN	Mammal	4891	3510	71.7645	1830	52.1368
21874	Thylogale browni	VU	Mammal	224830	161249	71.7204	14249	8.83664
54634	Peltophryne empusa	VU	Amphibian	46299	33150	71.5998	21750	46.9773
712	Ailuropoda melanoleuca	VU	Mammal	34647	24794	71.5618	3394	13.6888
22691480	Ptilinopus coralensis	NT	Bird	435	311	71.4943	66	15.1724
18149	Prionailurus rubiginosus	NT	Mammal	2419587	1728944	71.4562	1538841	89.0047
59448	Calotriton asper	NT	Amphibian	27427	19597	71.4515	10571	38.5423
56537	Craugastor cruzi	CR	Amphibian	7	5	71.4286	0	0
22691465	Ptilinopus rarotongensis	VU	Bird	70	50	71.4286	48	68.5714
2784	Bettongia lesueur	NT	Mammal	837	597	71.3262	225	37.6884
4366	Chaetomys subspinosus	VU	Mammal	110048	78477	71.3116	60477	77.0633
55718	Litoria daviesae	VU	Amphibian	7324	5220	71.2725	2518	34.3801
22715529	Megalurulus grosvenori	VU	Bird	4425	3150	71.1864	0	0
20294	Sminthopsis aitkeni	CR	Mammal	1150	818	71.1304	121	14.7922
22700886	Cotinga maculata	EN	Bird	154966	110199	71.1117	88399	57.0441
22728011	Pterodroma feae	NT	Bird	3444	2447	71.0511	967	28.0778
22710787	Cinnyricinclus femoralis	VU	Bird	5056	3592	71.0443	2259	44.6796
22706947	Dicrurus fuscipennis	EN	Bird	773	548	70.8926	372	48.1242
22685857	Pyrrhura rupicola	NT	Bird	548981	388946	70.8487	104525	19.0398
19542	Rhinolophus guineensis	VU	Mammal	181737	128704	70.8188	36804	28.5958
22697568	Platalea minor	EN	Bird	203254	143862	70.7794	114862	56.5116
55250	Mannophryne riveroi	EN	Amphibian	968	685	70.7645	148	15.2893
14734	Neurergus crocatus	VU	Amphibian	13443	9508	70.7283	6888	51.2386
22729421	Calonectris edwardsii	NT	Bird	3408	2409	70.6866	1316	38.615
58420	Quasipaa boulengeri	EN	Amphibian	994381	702390	70.6359	463390	46.6009
22695568	Accipiter collaris	NT	Bird	254917	180027	70.6218	104435	40.9682
15803	Ozotoceros bezoarticus	NT	Mammal	409968	289188	70.5392	150538	52.0554
16734	Petinomys fuscocapillus	NT	Mammal	29247	20616	70.4893	10216	49.5537
22726233	Ramphastos ariel	EN	Bird	2544636	1792759	70.4525	854359	33.5749
41023	Mazama bororo	VU	Mammal	238589	167379	70.1537	111098	66.3751
22704493	Pardalotus quadragintus	EN	Bird	5803	4067	70.0844	2508	43.219
22686511	Aerodramus francicus	NT	Bird	4350	3047	70.046	2159	49.6322
59482	Tylototriton asperrimus	NT	Amphibian	283121	198240	70.0195	126340	44.624
18377	Proteus anguinus	VU	Amphibian	35405	24785	70.0042	18214	51.4447
135993	Melanophryniscus admirabilis	CR	Amphibian	10	7	70	0	0
58161	Pipa myersi	EN	Amphibian	170	119	70	0	0
22696027	Clanga clanga	VU	Bird	27052825	18918890	69.9331	10927990	40.395
41052	Spicospina flammocaerulea	VU	Amphibian	497	347	69.8189	199	40.0402
55750	Litoria quadrilineata	VU	Amphibian	122	85	69.6721	52	42.623
40540	Sarcophilus harrisii	EN	Mammal	49481	34473	69.6692	14225	41.2642
58546	Lithobates areolatus	NT	Amphibian	637564	444169	69.6666	296158	46.4515
12143	Litoria aurea	VU	Amphibian	131771	91777	69.6489	46417	35.2255
22732147	Amaurornis magnirostris	VU	Bird	751	523	69.6405	294	39.1478
56508	Strabomantis cheiroplethus	VU	Amphibian	8013	5578	69.6119	1578	19.693
136114	Rana sierrae	EN	Amphibian	29441	20466	69.5153	3784	12.8528
22698320	Phoebastria irrorata	CR	Bird	774	538	69.509	287	37.0801
14224	Myrmecophaga tridactyla	VU	Mammal	9577218	6649620	69.4316	2966761	44.6155
10550	Hylobates moloch	EN	Mammal	39215	27212	69.3918	15647	57.5004
41050	Pseudophryne pengilleyi	EN	Amphibian	1117	775	69.3823	121	10.8326
56479	Pristimantis bromeliaceus	VU	Amphibian	7859	5452	69.3727	859	10.9301
59084	Batrachuperus londongensis	EN	Amphibian	1855	1286	69.3261	474	25.5526
22678135	Tinamus tao	VU	Bird	3829441	2653891	69.3023	1004791	26.2386
55256	Aromobates mayorgai	EN	Amphibian	403	279	69.2308	279	69.2308
22692353	Laterallus jamaicensis	NT	Bird	874231	605018	69.2057	358439	41.0005
18125	Presbytis comata	EN	Mammal	27022	18695	69.1844	9421	50.3932
56636	Eleutherodactylus guanahacabibes	EN	Amphibian	860	594	69.0698	231	26.8605
22705629	Aphelocoma coerulescens	VU	Bird	64801	44707	68.9912	36609	56.4945
138	Acerodon humilis	EN	Mammal	812	560	68.9655	325	58.0357
136320	Melomys talaudium	EN	Mammal	812	560	68.9655	325	58.0357
54559	Atelopus tricolor	VU	Amphibian	39856	27465	68.9106	4717	11.8351
58581	Pelophylax cretensis	EN	Amphibian	2315	1595	68.8985	1563	67.5162
136715	Melomys caurinus	EN	Mammal	809	557	68.8504	323	57.9892
10618	Hynobius takedai	EN	Amphibian	2994	2061	68.8377	2010	67.1343
22693351	Limnodromus semipalmatus	NT	Bird	3470724	2387482	68.7892	1485592	42.8035
59070	Ambystoma taylori	CR	Amphibian	16	11	68.75	0	0
22688327	Tauraco fischeri	NT	Bird	48278	33189	68.7456	23044	47.7319
22684831	Nestor notabilis	VU	Bird	63112	43346	68.6811	20176	31.9686
22698039	Pterodroma ultima	NT	Bird	2390	1640	68.6192	110	4.60251
59156	Bolitoglossa dofleini	NT	Amphibian	2240	1534	68.4821	194	8.66071
56878	Pristimantis prolatus	EN	Amphibian	2766	1894	68.4743	945	34.1649
21972	Tokudaia muenninki	CR	Mammal	237	162	68.3544	121	74.6914
22680225	Anas melleri	EN	Bird	211537	144487	68.3034	71287	33.6995
55603	Isthmohyla pictipes	EN	Amphibian	2863	1951	68.1453	601	20.992
22727626	Amazona festiva	NT	Bird	691866	470879	68.0593	77011	11.1309
22693107	Gallinago macrodactyla	VU	Bird	221081	150361	68.0117	72761	32.9115
59045	Spea hammondii	NT	Amphibian	121870	82588	67.7673	57034	46.799
55046	Hyloxalus anthracinus	CR	Amphibian	2277	1542	67.7207	589	25.8674
22681622	Psilopogon javensis	NT	Bird	75340	50922	67.5896	30800	40.8813
10149	Hipposideros marisae	VU	Mammal	31568	21310	67.5051	10	0.0469263
22720818	Paroreomyza montana	EN	Bird	1609	1086	67.4953	498	30.9509
11374	Latidens salimalii	EN	Mammal	15173	10241	67.4949	3191	31.1591
22679346	Syrmaticus reevesii	VU	Bird	533538	359978	67.47	264978	49.6643
59157	Bolitoglossa dunni	EN	Amphibian	187	126	67.3797	23	12.2995
22700900	Xipholena atropurpurea	EN	Bird	214913	144667	67.3142	120467	56.0538
21870	Thylogale brunii	VU	Mammal	94951	63888	67.2852	10097	15.8042
4256	Cervus albirostris	VU	Mammal	674989	453901	67.2457	304781	67.147
22685593	Primolius couloni	VU	Bird	422344	284000	67.2438	42930	10.1647
54751	Rhinella rubropunctata	VU	Amphibian	8821	5931	67.2373	461	5.22616
10274	Hyaena hyaena	VU	Mammal	18246908	12262696	67.2042	5925746	48.3234
22697925	Pseudobulweria rostrata	NT	Bird	15882	10668	67.1704	5876	36.9979
57856	Kaloula rigida	VU	Amphibian	6927	4651	67.1431	1301	18.7816
22711108	Toxostoma bendirei	VU	Bird	824243	553203	67.1165	255697	31.022
59351	Plethodon punctatus	NT	Amphibian	11160	7490	67.1147	2730	24.4624
22706049	Corvus torquatus	NT	Bird	2071325	1389332	67.0746	940870	45.4236
56626	Pristimantis gracilis	VU	Amphibian	5279	3540	67.0582	3422	64.8229
22718582	Anthus nilghiriensis	VU	Bird	11627	7793	67.025	653	5.61624
11796	Lepus yarkandensis	NT	Mammal	401716	269195	67.0113	18481	6.86528
57372	Thoropa saxatilis	NT	Amphibian	4892	3277	66.9869	1667	34.076
22691754	Ducula goliath	NT	Bird	16423	10997	66.961	4427	26.9561
55254	Aromobates duranti	EN	Amphibian	233	156	66.9528	156	66.9528
22691585	Drepanoptila holosericea	NT	Bird	16410	10986	66.947	4416	26.9104
22708574	Myadestes lanaiensis	CR (PE)	Bird	1467	981	66.8712	403	27.471
55875	Plectrohyla glandulosa	EN	Amphibian	5590	3732	66.7621	2582	46.1896
22714341	Megazosterops palauensis	NT	Bird	382	255	66.7539	155	40.5759
136392	Monodelphis reigi	VU	Mammal	30	20	66.6667	0	0
57553	Leptobrachium hainanense	VU	Amphibian	9647	6428	66.6321	3308	34.2905
22696201	Stephanoaetus coronatus	NT	Bird	6542121	4357255	66.6031	1634415	24.983
6301	Dasyurus spartacus	NT	Mammal	25811	17114	66.3051	5024	29.3561
56391	Eleutherodactylus acmonis	EN	Amphibian	3668	2430	66.2486	2001	54.5529
22678521	Crax rubra	VU	Bird	661564	437735	66.1667	167018	25.2459
22679961	Cyanochen cyanoptera	VU	Bird	363570	240324	66.1012	90324	24.8436
54708	Anaxyrus mexicanus	NT	Amphibian	155893	103045	66.0998	33385	21.4153
136519	Notopteris neocaledonica	VU	Mammal	10747	7102	66.0836	3062	43.1146
21534	Taudactylus rheophilus	CR	Amphibian	4678	3090	66.0539	761	16.2676
22685399	Loriculus catamene	NT	Bird	500	330	66	283	56.6
22678217	Crypturellus noctivagus	NT	Bird	1468443	969152	65.9986	663942	45.214
22066	Tremarctos ornatus	VU	Mammal	288327	190176	65.9584	42642	22.4224
22734448	Garrulax bicolor	VU	Bird	67611	44585	65.9434	7173	10.6092
22728956	Colinus virginianus	NT	Bird	4364991	2877861	65.9305	1843847	42.2417
62144610	Neomorphus geoffroyi	VU	Bird	2929936	1929620	65.8588	746833	25.4897
18435550	Atelopus podocarpus	CR	Amphibian	774	509	65.7623	77	9.94832
22693190	Numenius arquata	NT	Bird	42593386	28004188	65.7477	16348288	38.3822
22678440	Aburria aburri	NT	Bird	140221	91956	65.5793	26788	19.1041
57369	Telmatobius yuracare	VU	Amphibian	3645	2390	65.5693	630	17.284
14303	Naemorhedus griseus	VU	Mammal	2395257	1570101	65.5504	887938	56.5529
22713500	Cisticola haesitatus	NT	Bird	728	477	65.522	401	55.0824
58627	Odorrana jingdongensis	VU	Amphibian	111406	72971	65.5001	47971	43.0596
22696810	Phalacrocorax bougainvilliorum	NT	Bird	138585	90700	65.4472	36214	26.1313
22715535	Megalurulus llaneae	NT	Bird	1279	837	65.4418	10	0.781861
22707178	Pomarea nigra	CR	Bird	26	17	65.3846	0	0
58209	Amolops hainanensis	EN	Amphibian	12924	8446	65.3513	4586	35.4844
19513	Rhinoderma darwinii	VU	Amphibian	91848	59909	65.2262	30026	32.691
22691914	Neotis nuba	NT	Bird	2394657	1560599	65.17	882196	36.8402
18582	Pseudophryne corroboree	CR	Amphibian	1080	703	65.0926	124	11.4815
22734314	Pomarea iphis	VU	Bird	126	82	65.0794	0	0
56747	Eleutherodactylus martinicensis	NT	Amphibian	3794	2468	65.0501	2003	52.7939
22728206	Rhea tarapacensis	NT	Bird	425578	276301	64.9237	120976	28.4263
56703	Craugastor laticeps	NT	Amphibian	14886	9663	64.9133	2283	15.3366
55165	Hyloxalus vertebralis	CR	Amphibian	5983	3882	64.8838	3400	56.8277
6296	Dasyurus viverrinus	EN	Mammal	49168	31879	64.8369	11921	37.3945
7669	Emballonura semicaudata	EN	Mammal	1017	658	64.7001	278	42.2492
6989	Phyllomys thomasi	EN	Mammal	337	218	64.6884	87	39.9083
54509	Atelopus famelicus	CR	Amphibian	232	150	64.6552	75	32.3276
55394	Plectrohyla arborescandens	EN	Amphibian	3311	2138	64.5726	1574	47.5385
55912	Ptychohyla legleri	EN	Amphibian	821	530	64.5554	439	53.4714
22724821	Cissa thalassina	CR	Bird	33675	21734	64.5405	11034	32.7661
55342	Gastrotheca litonedis	EN	Amphibian	1715	1106	64.4898	1037	60.4665
19750	Rousettus madagascariensis	NT	Mammal	293594	188890	64.3371	93290	49.3885
22728432	Puffinus mauretanicus	CR	Bird	24293	15605	64.2366	13301	54.7524
22696898	Phalacrocorax gaimardi	NT	Bird	2202	1412	64.1235	984	44.6866
22694296	Larus heermanni	NT	Bird	3779	2423	64.1175	1106	29.267
45090397	Pauxi unicornis	CR	Bird	72498	46483	64.1163	8495	11.7176
55450	Hypsiboas cipoensis	NT	Amphibian	20425	13086	64.0685	3216	15.7454
55336	Gastrotheca gracilis	VU	Amphibian	4768	3054	64.052	344	7.21477
3180	Anaxyrus canorus	EN	Amphibian	10331	6613	64.0112	1929	18.672
22680482	Mergus octosetaceus	CR	Bird	1320630	844755	63.9661	707864	53.6005
55328	Gastrotheca chrysosticta	VU	Amphibian	3005	1921	63.9268	956	31.8136
58607	Odorrana grahami	NT	Amphibian	345219	220661	63.9191	156241	45.2585
19401	Reithrodontomys raviventris	EN	Mammal	864	552	63.8889	491	88.9493
57594	Oreolalax multipunctatus	VU	Amphibian	4537	2897	63.8528	717	15.8034
22733974	Pyrrhura pfrimeri	EN	Bird	7234	4618	63.8374	4403	60.8654
22735624	Hydrobates monteiroi	VU	Bird	287	183	63.7631	22	7.66551
58341	Limnonectes ingeri	NT	Amphibian	36448	23215	63.6935	3263	8.95248
16018	Papio papio	NT	Mammal	441023	280863	63.6844	135610	48.2833
19179	Rana pretiosa	VU	Amphibian	62512	39801	63.6694	9234	14.7716
22708519	Zoothera talaseae	NT	Bird	12129	7714	63.5996	54	0.445214
18746	Pteropus ornatus	VU	Mammal	18122	11525	63.5967	4844	42.0304
22696853	Phalacrocorax chalconotus	VU	Bird	1092	694	63.5531	223	20.4212
22717954	Nectarinia rufipennis	VU	Bird	4426	2808	63.4433	448	10.122
54534	Atelopus nicefori	CR	Amphibian	93	59	63.4409	1	1.07527
22681585	Mulleripicus pulverulentus	VU	Bird	2516802	1596382	63.429	484402	19.2467
22696533	Rollandia microptera	EN	Bird	40851	25909	63.4232	12323	30.1657
22692293	Rallicula leucospila	NT	Bird	16772	10637	63.4212	1048	6.24851
59224	Chiropterotriton cracens	EN	Amphibian	41	26	63.4146	0	0
58445	Nanorana yunnanensis	EN	Amphibian	557220	353109	63.3698	259289	46.5326
954	Alticola roylei	NT	Mammal	37369	23669	63.3386	5662	23.9216
22696916	Egretta rufescens	NT	Bird	566994	359123	63.3381	203321	35.8595
19176	Rana cascadae	NT	Amphibian	113854	72040	63.274	11400	10.0128
22721040	Calcarius ornatus	NT	Bird	3258791	2057776	63.1454	887166	27.2238
58715	Pelophylax shqipericus	EN	Amphibian	4600	2902	63.087	2514	54.6522
22697997	Pterodroma longirostris	VU	Bird	1032	651	63.0814	3	0.290698
22686543	Aerodramus vulcanorum	NT	Bird	8047	5071	63.0173	1341	16.6646
41048	Pseudophryne covacevichae	EN	Amphibian	382	240	62.8272	39	10.2094
18765	Pteropus tuberculatus	CR	Mammal	172	108	62.7907	0	0
58784	Buergeria oxycephala	VU	Amphibian	13675	8586	62.7861	4696	34.34
55122	Allobates olfersioides	VU	Amphibian	257286	161520	62.7784	132520	51.5069
6265	Dasyuroides byrnei	VU	Mammal	45250	28400	62.7624	0	0
22685029	Prosopeia splendens	VU	Bird	394	247	62.6904	118	29.9492
136496	Rhinolophus robinsoni	NT	Mammal	47040	29480	62.6701	14782	50.1425
22686014	Touit huetii	VU	Bird	1804308	1129057	62.5756	281607	15.6075
12646	Macrotarsomys ingens	EN	Mammal	3013	1885	62.5622	1280	67.9045
22685203	Neophema chrysogaster	CR	Bird	32261	20159	62.4872	10248	31.7659
19175	Rana boylii	NT	Amphibian	194991	121563	62.3429	20000	10.2569
58650	Sanguirana luzonensis	NT	Amphibian	19691	12268	62.3026	5998	30.4606
22698084	Pterodroma incerta	EN	Bird	1366	851	62.2987	759	55.5637
57576	Leptolalax tuberosus	VU	Amphibian	3860	2404	62.2798	144	3.73057
22732956	Zoothera leucolaema	NT	Bird	347	216	62.2478	81	23.3429
22727593	Cyclopsitta coxeni	CR	Bird	93566	58225	62.2288	32103	34.3105
58971	Rhacophorus annamensis	VU	Amphibian	31615	19670	62.2173	2770	8.76166
22691236	Treron pembaensis	VU	Bird	849	528	62.1908	402	47.3498
22679385	Polyplectron malacense	VU	Bird	117118	72833	62.1877	36464	31.1344
22685606	Primolius maracana	NT	Bird	4061662	2524578	62.1563	1736497	42.7534
22725573	Ducula oenothorax	NT	Bird	346	215	62.1387	81	23.4104
929	Alsodes montanus	VU	Amphibian	5172	3203	61.9296	63	1.2181
22696197	Spizaetus ornatus	NT	Bird	9483145	5871555	61.9157	2661055	28.0609
22686201	Amazona leucocephala	NT	Bird	121333	75042	61.848	42662	35.1611
59087	Batrachuperus tibetanus	VU	Amphibian	251352	155362	61.8105	120262	47.846
22685812	Pyrrhura perlata	VU	Bird	1135923	702104	61.8091	224744	19.7851
22690229	Patagioenas leucocephala	NT	Bird	239049	147514	61.7087	97347	40.7226
56666	Pristimantis incanus	EN	Amphibian	845	521	61.6568	237	28.0473
22697963	Pterodroma inexpectata	NT	Bird	8275	5102	61.6556	2540	30.6949
22715542	Megalurulus whitneyi	NT	Bird	4222	2603	61.6532	243	5.75557
22692785	Megacrex inepta	NT	Bird	89999	55467	61.6307	2390	2.65559
58054	Pelobates varaldii	EN	Amphibian	6688	4115	61.5281	3815	57.0425
22685548	Ara militaris	VU	Bird	592934	364797	61.524	113993	19.2252
22679770	Dendrocygna arborea	VU	Bird	112264	69051	61.5077	42766	38.0941
41789	Rusa timorensis	VU	Mammal	11025	6779	61.4875	1560	23.0122
22678449	Penelopina nigra	VU	Bird	103835	63741	61.3868	28511	27.458
22679299	Crossoptilon mantchuricum	VU	Bird	188921	115778	61.2838	103678	54.879
62181308	Pionites leucogaster	EN	Bird	1990018	1217355	61.1731	394655	19.8317
22684668	Charmosyna meeki	NT	Bird	6556	4010	61.1653	290	4.42343
22729471	Capito wallacei	VU	Bird	190	116	61.0526	0	0
22043	Trachypithecus delacouri	CR	Mammal	6055	3693	60.9909	2173	58.8411
190987	Bufo eichwaldi	VU	Amphibian	17214	10490	60.9388	5720	33.2288
41436	Chodsigoa smithii	NT	Mammal	48312	29430	60.9165	9330	31.7023
56995	Craugastor taurus	CR	Amphibian	110	67	60.9091	28	25.4545
45470698	Psophia dextralis	EN	Bird	1012990	616657	60.8749	188657	18.6238
22717941	Nectarinia rockefelleri	VU	Bird	10536	6410	60.839	0	0
22682727	Pharomachrus mocinno	NT	Bird	149984	91176	60.7905	31476	20.9862
19709	Rhynchocyon cirnei	NT	Mammal	1593960	968821	60.7808	325369	33.584
22697776	Eudyptes pachyrhynchus	VU	Bird	1660	1008	60.7229	781	47.0482
6671	Diplothrix legata	EN	Mammal	636	386	60.6918	290	75.1295
22692162	Grus nigricollis	VU	Bird	889228	539090	60.6245	257261	28.9308
22679514	Tympanuchus cupido	VU	Bird	3286153	1990200	60.5632	1129480	34.3709
22686145	Pyrilia vulturina	VU	Bird	888262	537539	60.5158	100739	11.3411
22710562	Aplonis mystacea	NT	Bird	140750	85155	60.5009	3492	2.48099
22680384	Aythya baeri	CR	Bird	8822230	5326278	60.3734	3230918	36.6225
55146	Aromobates saltuensis	EN	Amphibian	353	213	60.3399	213	60.3399
22698042	Pterodroma solandri	VU	Bird	4160	2507	60.2644	1700	40.8654
22678949	Coturnix japonica	NT	Bird	8734991	5238037	59.9661	3000837	34.3542
22726346	Caprimulgus phalaena	NT	Bird	357	214	59.944	125	35.014
16559	Pentalagus furnessi	EN	Mammal	242	145	59.9174	113	77.931
10644	Hyperolius pickersgilli	CR	Amphibian	2254	1350	59.8935	1333	59.1393
41643	Nomascus hainanus	CR	Mammal	162	97	59.8765	74	76.2887
22708523	Zoothera margaretae	NT	Bird	2027	1210	59.6941	460	22.6936
22679292	Crossoptilon crossoptilon	NT	Bird	172484	102962	59.6937	58937	34.1695
22698140	Procellaria aequinoctialis	VU	Bird	11972	7144	59.6726	3392	28.3328
22702295	Synallaxis courseni	VU	Bird	57	34	59.6491	34	59.6491
22689559	Aegotheles savesi	CR	Bird	16966	10080	59.4129	3490	20.5706
45418540	Eupsittula nana	NT	Bird	10861	6441	59.3039	5021	46.2296
58052	Pelobates cultripes	NT	Amphibian	490326	290748	59.2969	187416	38.2227
22678108	Casuarius casuarius	VU	Bird	393359	233118	59.2634	30625	7.78551
22679063	Arborophila ardens	VU	Bird	13243	7848	59.2615	4358	32.908
22688679	Otus pembaensis	VU	Bird	891	528	59.2593	402	45.1178
56458	Craugastor berkenbuschii	NT	Amphibian	56347	33384	59.2472	13584	24.1078
14149	Myotis bombinus	NT	Mammal	1193385	706056	59.1641	9390	1.32992
56870	Craugastor podiciferus	NT	Amphibian	10852	6420	59.1596	1060	9.76778
59229	Chiropterotriton multidentatus	EN	Amphibian	4431	2619	59.1063	1089	24.5768
22696479	Falco hypoleucos	VU	Bird	5386412	3181818	59.0712	1074798	19.9539
45470705	Psophia viridis	VU	Bird	703560	415153	59.0075	108413	15.4092
57326	Telmatobius bolivianus	NT	Amphibian	6412	3780	58.952	1260	19.6507
58675	Odorrana narina	EN	Amphibian	296	174	58.7838	133	44.9324
4151	Cephalophus spadix	EN	Mammal	6613	3880	58.6723	470	12.1134
22678429	Pipile jacutinga	EN	Bird	1094318	641669	58.6364	501004	45.7823
55083	Colostethus fraterdanieli	NT	Amphibian	15598	9140	58.5973	6090	39.0435
22693962	Vanellus macropterus	CR	Bird	7388	4327	58.5679	4116	55.712
55629	Plectrohyla robertsorum	EN	Amphibian	147	86	58.5034	69	46.9388
22680810	Melanerpes erythrocephalus	NT	Bird	5451877	3183372	58.3904	2101872	38.5532
[truncated: 3,458 more rows]

## Sheet: Summarised Data for Fig. 2.
IUCN Extinction risk status	Mean proportion of range impacted by one threat	Number of species	variance	standard error
Near threatened	31.2	1439	1458.9	1.00794
Vulnerable	40.8	1619	1713.8	1.0295
Endangered	37.9	1548	1816.5	1.08361
Critcally endangered	46.4	851	1952.3	1.51553
